## Silencing cryptic specialized metabolism in *Streptomyces* by the nucleoid-associated protein Lsr2

Emma J. Gehrke<sup>1,2</sup>, Xiafei Zhang<sup>1,2</sup>, Sheila M. Pimentel-Elardo<sup>3</sup>, Andrew R. Johnson<sup>4</sup>, Christiaan A. Rees<sup>6</sup>, Stephanie E. Jones<sup>1,2</sup>, Hindra<sup>1,2</sup>, Sebastian S. Gehrke<sup>2,5</sup>, Sonya Turvey<sup>1,2</sup>, Suzanne Boursalie<sup>1,2</sup>, Jane E. Hill<sup>6</sup>, Erin E. Carlson<sup>4,7</sup>, Justin R. Nodwell<sup>3</sup>, Marie A. Elliot<sup>1,2\*</sup>

<sup>1</sup> Department of Biology and <sup>2</sup> Michael G. DeGroot Institute for Infectious Disease Research, McMaster University, Hamilton, Ontario, Canada

<sup>3</sup> Department of Biochemistry, University of Toronto, Toronto, Ontario, Canada

<sup>4</sup> Department of Chemistry, Indiana University, Bloomington, Indiana, USA

<sup>5</sup> Department of Biochemistry and Biomedical Sciences, McMaster University, Hamilton, Ontario Canada

<sup>6</sup> Geisel School of Medicine and Thayer School of Engineering, Dartmouth College, Hanover, New Hampshire, USA

<sup>7</sup> Department of Chemistry, University of Minnesota, Minneapolis, Minnesota, USA

**Keywords:** nucleoid-associated protein, *Streptomyces*, specialized metabolism, cryptic cluster, repression

\* Corresponding author, E-mail: [melliot@mcmaster.ca](mailto:melliot@mcmaster.ca)

## 1 ABSTRACT

2 Lsr2 is a nucleoid-associated protein conserved throughout the actinobacteria, including the antibiotic-  
3 producing *Streptomyces*. *Streptomyces* species encode paralogous Lsr2 proteins (Lsr2 and Lsr2-like, or  
4 LsrL), and we show here that of the two, Lsr2 has greater functional significance. We found that Lsr2  
5 binds AT-rich sequences throughout the chromosome, and broadly represses gene expression.  
6 Strikingly, specialized metabolic clusters were over-represented amongst its targets, and the cryptic  
7 nature of many of these clusters appears to stem from Lsr2-mediated repression. Manipulating Lsr2  
8 activity in model species and uncharacterized isolates resulted in the production of new metabolites not  
9 seen in wild type strains. Our results suggest that the transcriptional silencing of biosynthetic clusters by  
10 Lsr2 may protect *Streptomyces* from the inappropriate expression of specialized metabolites, and  
11 provide global control over *Streptomyces*' arsenal of signalling and antagonistic compounds.

12

## 13 INTRODUCTION

14 Chromosomes are remarkably dynamic molecules. In eukaryotes, chromosome structure is  
15 governed largely by histones, while in bacteria, organization is provided by the nucleoid-associated  
16 proteins. Collectively, these proteins function both in architectural capacities and in regulatory roles.  
17 Chromosome evolution in bacteria can be being driven by mutation, genome rearrangement, and  
18 horizontal gene transfer, and work over the last decade has revealed that many bacteria have co-opted  
19 nucleoid-associated proteins to additionally serve as 'genome sentinels', suppressing the inappropriate  
20 expression of newly acquired DNA (Dorman, 2007; Dorman, 2014). This is thought to maximize  
21 competitive fitness by repressing the expression of foreign DNA until it is either incorporated into the  
22 existing regulatory networks of the host, or decays to a point that it is lost from the chromosome  
23 (Navarre *et al.*, 2007).

24 Different bacteria employ distinct nucleoid-associated proteins as xenogeneic silencers,  
25 including H-NS in the proteobacteria, MvaT/MvaU in the pseudomonads (Castang *et al.*, 2008), Rok in  
26 *Bacillus* species (Smits and Grossman, 2010), and Lsr2 in the actinobacteria (Gordon *et al.*, 2008). None  
27 of these proteins share sequence or structural homology, but all act by binding to AT-rich regions within  
28 the chromosome (Navarre, 2006; Castang *et al.*, 2008; Gordon *et al.*, 2010; Smits and Grossman, 2010).  
29 H-NS has been the best-studied of these proteins. In *Escherichia coli* and *Salmonella*, H-NS represses the  
30 expression of pathogenicity islands, endogenous phage genes, as well as other genes needed to respond  
31 to environmental changes (Lucchini *et al.*, 2006; Navarre, 2006). H-NS binds DNA as a dimer, and can

32 either polymerize along the DNA to form a rigid filament (Liu *et al.*, 2010), or bridge DNA to facilitate  
33 chromosome compaction (Dame *et al.*, 2000; Dame *et al.*, 2006); both activities can limit the activity of  
34 RNA polymerase. Lsr2 is thought to function similarly to H-NS. To date, its study has been confined to  
35 the mycobacteria, where Lsr2 specifically binds and represses the expression of horizontally transferred  
36 genomic islands and AT-rich regions, including major virulence factor-encoding genes (Gordon *et al.*,  
37 2010).

38 In contrast to many of the pathogens in which chromosome organization and genome silencing  
39 has been explored, the streptomycetes are largely benign, sporulating soil bacteria (Flårdh and Buttner,  
40 2009) that are instead renowned for their ability to produce a wide array of specialized metabolites  
41 (Hopwood, 2007; Barka *et al.*, 2016). Notably, the metabolic output of this actinobacterial genus  
42 includes the majority of naturally-derived antibiotics used to treat bacterial infections. The  
43 streptomycetes encode two Lsr2 paralogues, unlike their mycobacterial relatives who possess a single  
44 *lsr2* gene. *Streptomyces* are additionally unusual in that they have linear chromosomes, where the  
45 majority of the genes required for viability are clustered in the chromosome core, and more species-  
46 specific and laterally-acquired genes are located in the flanking chromosome arms (Bentley *et al.*, 2002).  
47 It is within these arm regions that most of the specialized metabolic clusters are found. Recent work has  
48 revealed that specialized metabolic clusters are over-represented as horizontally-transferred elements  
49 in the streptomycetes (McDonald and Currie, 2017), and that in the closely-related *Salinospora*, lateral  
50 gene transfer is a major driver of specialized metabolism (Ziemert *et al.*, 2014).

51 Specialized metabolic gene clusters are subject to complex, hierarchical regulatory control (van  
52 Wezel and McDowall, 2011; Liu *et al.*, 2013). Most *Streptomyces* clusters contain dedicated pathway-  
53 specific regulators, which in turn are controlled by a suite of more globally-acting transcription factors.  
54 Interestingly, however, most clusters are poorly expressed under normal laboratory conditions, and in  
55 many cases their associated metabolites remain uncharacterized. This is also the case for the  
56 filamentous fungi, many of whom have a broad, untapped specialized metabolic repertoire, courtesy of  
57 transcriptional silencing by histones (Pfannenstiel and Keller, 2019). Significant efforts are being made to  
58 stimulate the production of these ‘cryptic’ metabolites in both bacteria and fungi, as they are widely  
59 regarded as productive sources of new natural products (Craney *et al.*, 2013; Ochi and Hosaka, 2013;  
60 Scharf and Brakhage, 2013; Yoon and Nodwell, 2014; Daniel-Ivad *et al.*, 2017; Onaka, 2017).

61 We sought to investigate the role of the nucleoid-associated proteins Lsr2 and LsrL in gene  
62 regulation in *Streptomyces*. We found that deleting *lsr2* from the chromosome of *Streptomyces*  
63 *venezuelae* had minor effects on *S. venezuelae* growth and development and major effects on

64 metabolism. In contrast, deleting *lslL* had no detectable impact on development, and only a minor effect  
65 on metabolism. Focussing on *Lsr2*, we determined that it bound AT-rich regions, generally repressed the  
66 expression of prophage genes and other genes unique to *S. venezuelae* (presumably acquired by lateral  
67 gene transfer), and suppressed antisense gene expression. The most profound effect of *lsl2* deletion,  
68 however, was the large-scale activation of specialized metabolic cluster gene expression. *Lsr2* directly  
69 repressed the transcription of many cryptic clusters in a way that is analogous to *Lsr2*- and H-NS-  
70 mediated repression of pathogenicity islands in other bacteria, and histone-mediated cluster silencing in  
71 fungi. Unexpectedly, *Lsr2* also controlled the expression of well-characterized and highly-conserved  
72 clusters, suggesting that *Lsr2* control has been broadly integrated into the regulatory cascades governing  
73 specialized metabolism. Our results suggest that *Lsr2* functions as a metabolic gatekeeper in the  
74 streptomycetes, playing a critical role in the metabolic circuitry of these organisms, and that bacteria,  
75 like fungi, employ chromosome structuring elements to control specialized metabolism. Finally, we have  
76 manipulated *Lsr2* activity using dominant negative variants, and successfully promoted the production  
77 of otherwise cryptic metabolites in a wide range of *Streptomyces* species.

78

## 79 RESULTS

### 80 ***Lsr2* and *Lsr2*-like (*LsrL*) in *Streptomyces venezuelae***

81 All *Streptomyces* species possess two *lsl2* homologues (Chandra and Chater, 2014). We  
82 examined these gene products and found that within any given species, the homologues shared ~50%  
83 end-to-end amino acid identity and 60-65% sequence similarity. One homologue shared both genomic  
84 synteny and greater sequence similarity when compared with *Lsr2* from *M. tuberculosis* (**Figure S1**). We  
85 termed this protein *Lsr2* (SVEN\_3225 in *S. venezuelae*), and its more divergent homologue *LsrL*, for *Lsr2*-  
86 like (SVEN\_3832 in *S. venezuelae*).

87 To determine the biological role of these two genes and their products, we constructed single  
88 and double mutants in *S. venezuelae*. Deleting *lsl2* had no observable effect on *S. venezuelae* growth in  
89 liquid culture (**Figure 1A**). Sporulation was, however, reproducibly delayed in the mutant (**Figure 1A,B**),  
90 and the ‘exploration’ capabilities of the mutant (Jones *et al.*, 2017) were altered compared with wild  
91 type (**Figure S2**). Metabolism was also affected, with the mutant strain producing enhanced levels of  
92 melanin compared with its wild type parent (**Figure 1B**). Melanin over-production and the delay in  
93 sporulation could be partially complemented through the *in trans* expression of *lsl2* (**Figure S2**). In  
94 contrast, deleting *lslL* had no discernable effect on *S. venezuelae* growth or development, while a  
95 double *lsl2 lslL* mutant strain most closely resembled the *lsl2* single mutant (**Figure 1**).

96 We examined the expression of *Lsr2* and *LsrL* throughout the *S. venezuelae* life cycle using RNA  
97 sequencing data collected at three time points, and found *Lsr2* transcripts reached maximal levels during  
98 the later stages of liquid culture growth (**Figure 1C**). In comparison, *LsrL* levels were lower and peaked  
99 earlier (**Figure 1C**). We focussed our subsequent investigations on *Lsr2*, given its higher transcript levels  
100 and more pronounced mutant phenotype.

### 101 102 **Lsr2 represses the expression of horizontally acquired and specialized metabolic genes in *S.*** 103 ***venezuelae***

104 To begin understanding the effect of *Lsr2* on *Streptomyces* growth and metabolism, we isolated  
105 RNA samples from wild type and *Lsr2* mutant strains (see above), and compared transcript levels for the  
106 two strains using RNA-sequencing. The most striking differences were seen at the final growth stage  
107 (third time point), coinciding with the timing of maximal *Lsr2* expression (**Figure 1C**). Using a stringent  
108 cut-off (>4 fold change, with a *q* value <0.01), we found that 484 genes has significantly altered  
109 expression in the *Lsr2* mutant relative to wild type (**Table S1**). This represented ~6% of genes in the  
110 chromosome, and for the vast majority (>90%) of these genes, expression was up-regulated. These  
111 differentially expressed genes included many horizontally acquired genes: ~10% were phage-related (43  
112 of 484), and an additional 10% (47 genes) were unique to *S. venezuelae*, relative to the other  
113 *Streptomyces* genomes available in StrepDB ([strepdb.streptomyces.org.uk/](http://strepdb.streptomyces.org.uk/)) (**Figure 2A; Table S1**). We  
114 also observed increased antisense expression in a number of instances, suggesting that like its H-NS  
115 counterpart in *E. coli*, *Lsr2* can also suppress intragenic transcription (Singh *et al.*, 2014) (**Figure S3**).

116 We noted that *LsrL* expression was significantly increased relative to wild type (**Table S1**). There  
117 was, however, no significant change in the expression of any of the well-characterized developmental  
118 genes in the *Lsr2* mutant (**Table S1**). In contrast, specialized metabolic genes were disproportionately  
119 affected by *Lsr2*, with 155 of 484 differentially impacted genes (**Table S1**) localized to specialized  
120 metabolic clusters; this corresponded to ~15% of all predicted specialized metabolic genes in the  
121 chromosome, compared with altered expression for <5% of all others (non-specialized metabolic genes).  
122 Consistent with the enhanced brown pigmentation observed for the *Lsr2* mutant, we observed increased  
123 expression for genes in one of the predicted melanin biosynthetic clusters (**Table 1; Table S1**). Overall,  
124 deleting *Lsr2* led to altered expression for genes within 21 of 30 predicted or characterized specialized  
125 metabolic clusters, with increased expression (ranging from 4~900×) observed for genes in 18 of these  
126 clusters (**Table 1; Table S1**). Indeed, for six clusters, more than one-third of their genes were significantly  
127 upregulated (**Table 1; Table S1**); predicted cluster boundaries are typically very generous (*e.g.* the

128 chloramphenicol cluster is predicted to extend from *sven\_0902-0945*, while the experimentally  
129 validated cluster encompasses *sven\_0913-0928*), and as a result we anticipate that the relevant  
130 proportion of upregulated genes in these clusters is actually much higher. Importantly, of these six  
131 clusters, five were largely transcriptionally silent in the wild type strain (**Figure 3**), with an average RPKM  
132 for the differentially affected genes being <10 in the wild type, compared with an average of >190 in the  
133 *lsr2* mutant (**Table S1**).

134 We experimentally validated our RNA sequencing results using reverse transcription-PCR,  
135 focussing on select genes from clusters specifying a range of predicted products (polyketides,  
136 thiopeptides, butyrolactones, and non-ribosomal peptides). In each case, transcripts were only  
137 reproducibly detected in the *lsr2* null mutant (**Figure S4**). This suggested that Lsr2 functions as a  
138 principal regulator for the majority of specialized metabolites in *S. venezuelae*, repressing the activity of  
139 these clusters under laboratory conditions.

140

#### 141 **Lsr2 directly controls specialized metabolite cluster expression**

142 To determine whether the effects observed in our transcription profiling experiments stemmed  
143 from direct or indirect control by Lsr2, we examined our RNA-seq data for significant changes in the  
144 expression of any known global antibiotic regulators. Unexpectedly, none were affected by the loss of  
145 Lsr2 (**Table S2**), suggesting that Lsr2 may directly impact specialized metabolic cluster expression. We  
146 next conducted chromatin-immunoprecipitation (ChIP) sequencing experiments to identify Lsr2-  
147 associated DNA sequences using a functional Lsr2-3×FLAG fusion-expressing strain (**Figure S2**). We  
148 isolated immunoprecipitated DNA from FLAG-tagged and control (untagged Lsr2-expressing) strains late  
149 during liquid culture growth, at a developmental stage corresponding to the third time point in our  
150 transcriptional analyses. Using a stringent filter ( $q$  value <0.01), we identified 223 Lsr2 binding sites  
151 distributed throughout the chromosome (**Figure 2A; Table S3**). These included sites within 17  
152 specialized metabolic clusters (**Table 1**), with 14 of these clusters showing altered transcriptional profiles  
153 in the *lsr2* mutant compared with the wild type strain (*e.g.* **Figure 3**).

154 The effect of Lsr2 on specialized metabolism, and the lack of association with other  
155 characterized global regulators, collectively suggested that Lsr2 activity may represent a new level in the  
156 regulatory cascades governing specialized metabolism. As most globally acting antibiotic regulators  
157 exert their effects by controlling the expression of pathway-specific regulators (*e.g.* McKenzie and  
158 Nodwell, 2007; Rigali *et al.*, 2008; Gao *et al.*, 2012; Wang *et al.*, 2013), we tested whether this was also  
159 the case for Lsr2. For the 14 clusters that were bound directly by Lsr2 and had altered transcription

160 profiles, we examined where Lsr2 bound, relative to any potential cluster-specific regulators. For  
161 approximately half (8 of 14), Lsr2 binding was associated with a regulatory gene (**Table 1**). For the  
162 others, Lsr2 bound elsewhere in the cluster, suggesting an independent mechanism of regulation.

163

#### 164 **Trends in Lsr2 binding and regulatory control**

165 To better understand how Lsr2 exerted its repressive effects, we undertook a more  
166 comprehensive investigation into its binding and regulatory impacts. We first validated the specificity of  
167 Lsr2 binding using electrophoretic mobility shift assays (EMSAs). We tested five ChIP-associated  
168 sequences, and found that each of these effectively out-competed non-specific DNA probes for binding  
169 by Lsr2. This indicated that Lsr2 preferentially bound the DNA regions identified in our ChIP assays  
170 (**Figure S5**).

171 Our ChIP-seq results suggested that Lsr2 bound to 223 sites across the chromosome.  
172 Interestingly, these sites were not concentrated in the arm regions where more of the species-specific  
173 (and presumably laterally-acquired) sequences were located, but instead were enriched in the ‘core’  
174 region of the chromosome (as defined by Bentley *et al.*, 2002) (**Figure 2B; Table S3**). When considering  
175 all Lsr2 binding sites, ~25% of the associated genes (where Lsr2 bound immediately upstream and/or  
176 overlapping with their coding sequences) had altered transcriptional profiles, and of these, more than  
177 30% were in specialized metabolic clusters (19 of 63) (**Table 1; Table S3**)

178 We assessed whether there was any correlation between binding site position and regulatory  
179 impact. We found that binding sites within the arm regions were more likely to have transcriptional  
180 ramifications compared with those in the core [35% (left arm), 40% (right arm), 25% (core)] (**Figure 2B**).  
181 Binding sites associated with transcriptional changes were also, on average, larger than those that had  
182 no direct effect on transcription, at least for the left and core regions (**Table S3; Figure 2C**), although  
183 there were a number of large sites within the core region that had no direct effect on transcription.

184 We next sought to understand whether there was any specificity to Lsr2 binding in the  
185 chromosome. We analyzed the *in vitro*-confirmed Lsr2 binding sites (from **Figure S5**) using the MEME  
186 server (Bailey *et al.*, 2009); however, no consensus motif could be identified. In examining the cluster-  
187 associated binding sites more broadly, we found these sequences had an average GC-content of 62.9%.  
188 When all Lsr2 binding sites were considered, an average GC-content of 65% was observed (**Table S3**),  
189 well below the chromosome average of 72.4%.

190 Previous *in vitro* analyses of binding preferences for Lsr2 from *M. tuberculosis*, had defined an  
191 eight nucleotide AT-rich sequence as being optimal (Gordon *et al.*, 2011). We analyzed both the S.

192 *venezuelae* genome, and our identified Lsr2 binding sites, for either AT-rich 20 nt segments ( $\geq 50\%$  A/T),  
193 or AT-rich 'core' sequences (defined as 5 of 6 consecutive nucleotides being A/T). To first determine the  
194 relative AT density in the *S. venezuelae* chromosome, we assessed the number of 20 nt AT-rich stretches  
195 in 30 randomly selected sequences – 15 that were 500 bp and 15 that were 1000 bp in length (**Dataset**  
196 **S1**). We found that 7/15 of the shorter sequences lacked any AT-rich stretch (with the number of  
197 stretches ranging from 0-20, with an average of 5), compared with 2/15 of the longer sequences (with  
198 numbers ranging from 0-36, and an average of 10). In contrast, the vast majority (222/223) of Lsr2  
199 target sequences possessed at least one AT-rich 20 nt stretch: shorter target sequences ( $\leq 500$  bp)  
200 contained anywhere from 0 to 27 non-overlapping stretches (average of 7), while longer sequences  
201 ( $\geq 750$  bp) contained between 8 and 291 (average of 64) (**Dataset S1**).

202 We next assessed the presence of AT-rich core sequences within both the random genome  
203 sequences, and the Lsr2-bound sites (**Dataset S1**). For the random segments, 11/15 of the 500 bp  
204 sequences lacked an AT-rich core (with numbers ranging from 0-10, with an average  $< 1$ ). This closely  
205 mirrored the absence of an AT-rich core in 10/15 of the 1000 bp sequences (range of 0-8, with an  
206 average of 1.5). This is in stark contrast to the Lsr2 target binding sequences: only 9 of 223 target  
207 sequences lacked an AT-rich core, with shorter sequences ( $\leq 500$  bp) averaging three core sites (ranging  
208 from 0-11), and larger sequences ( $\geq 750$  bp) averaging 25 (ranging from 1-124). This collectively  
209 suggested that while the presence of an AT-rich core sequence and multiple AT-rich segments may not  
210 be sufficient to promote Lsr2 binding, they appear to be near universal characteristics of Lsr2-bound  
211 sequences.

212 To experimentally assess the importance of these AT-rich sequences for Lsr2 binding, we  
213 focussed our attention on the Lsr2 binding site located in the intergenic region between the divergently  
214 expressed *sven\_5106* and *sven\_5107* genes within the predicted butyrolactone biosynthetic cluster  
215 (**Table 1; Figure S6**). Using EMSAs, we compared Lsr2 binding to the wild type sequence (58% GC), with  
216 binding to mutant sequences having increasing GC content (63%, 64% and 70%). Lsr2 bound the AT-rich  
217 sequences with much higher affinity than the more GC-rich sequences, with very little binding observed  
218 for the 70% GC-containing probe (**Figure S7**). Notably, there was little difference in binding seen for  
219 sequences in which an AT-rich core was disrupted (64% GC), versus when the overall AT-content was  
220 changed (63% GC) (**Figures S6 and S7**). To determine whether the Lsr2 preference for more AT-rich DNA  
221 was also observed *in vivo*, we introduced these altered sequences in place of the wild type, within a  
222 larger DNA fragment (spanning 9 kb and encompassing *sven\_5105-07*) on an integrating plasmid vector,  
223 and introduced these variants into the Lsr2-3 $\times$ FLAG-expressing strain. We conducted ChIP experiments



224 for each strain, and quantified the amount of DNA specific for this region using quantitative PCR. We  
225 observed far higher levels of the wild type sequence compared with any of the mutant sequences (>80%  
226 less), presumably reflecting greater Lsr2 affinity for the wild type, AT-rich sequence (**Figure S7**). We also  
227 assessed the expression of the flanking genes in each case, and observed little expression from the wild  
228 type sequence, while increased expression was associated with the mutant sequences. This indicated  
229 that decreased binding by Lsr2 led to increased transcription of the flanking genes (**Figure S7**).

230

### 231 **Lsr2 activity is not specific for newly acquired biosynthetic clusters**

232 Given that Lsr2 is predicted to be functionally equivalent to H-NS in *E. coli*, where H-NS inhibits  
233 the expression of laterally-acquired DNA sequences, we wanted to determine whether Lsr2  
234 preferentially bound and repressed the expression of recently acquired (poorly conserved) biosynthetic  
235 clusters in *S. venezuelae*. To investigate cluster conservation, we subjected the sequence of each of the  
236 30 *S. venezuelae* specialized metabolic clusters to BLAST searches. We focussed our attention on eight  
237 phylogenetically divergent *Streptomyces* species, alongside three strains of *S. venezuelae*, and assessed  
238 the conservation of each cluster within these streptomycetes (**Figure 4; Table 1**). As expected, we found  
239 that Lsr2 bound and repressed the expression of genes in many poorly conserved/recently acquired  
240 clusters. However, not all *S. venezuelae*-specific clusters were controlled by Lsr2, and several of the best  
241 conserved clusters (*e.g.* siderophore/desferrioxamine-encoding biosynthetic cluster and bacteriocin-  
242 encoding clusters) were under direct Lsr2 control (**Figure 4; Table 1**). This suggested that Lsr2 may  
243 function both as a silencer of newly acquired clusters, and as a central regulator within the hierarchy  
244 governing specialized metabolic cluster expression.

245

### 246 **Deleting Lsr2 reprograms specialized metabolism and yields novel compounds**

247 Given the abundance of specialized metabolic genes affected by Lsr2, we examined the  
248 antibiotic production capabilities of the *lsr2* mutant. Crude methanol extracts from wild type and *lsr2*  
249 mutant cultures were initially tested against the Gram-positive indicator bacterium *Micrococcus luteus*.  
250 We observed a significant increase in growth inhibition for extracts from the *lsr2* mutant relative to the  
251 wild type strain (**Figure 5A**). Using activity guided fractionation and purification coupled with LC/MS  
252 analyses, we identified chloramphenicol as being the major inhibitory molecule (**Figure 5B**).  
253 Chloramphenicol is a well-known antibiotic, but it is not expressed at appreciable levels by *S. venezuelae*  
254 under normal laboratory conditions (**Figure 5B**) (Fernández-Martínez *et al.*, 2014).

255 We next compared the soluble metabolites produced by wild type and *lsr2* mutant strains, and  
256 found each had a unique metabolic profile. We further tested the metabolic effects of deleting *lsrL*, and  
257 *lsr2* in conjunction with *lsrL*, as the increased *lsrL* expression observed in the *lsr2* mutant suggested that  
258 a double mutant may have more profound metabolic consequences than the *lsr2* mutation alone.  
259 Comparing the metabolic profiles of these four strains revealed that the greatest effect stemmed from  
260 the loss of *lsr2*, although the loss of *lsrL* (on its own, and in conjunction with *lsr2*) led to minor changes in  
261 metabolic output (**Figure S8**). In comparing the production of individual metabolites in a wild type and  
262 *lsr2* mutant strain, we first focussed our attention on compounds produced after 3 days of growth in  
263 liquid MYM medium. We observed unique peaks in the *lsr2* mutant for venemycin, a chlorinated  
264 venemycin derivative, as well as thiazostatin and watasemycin (**Figure 5C**). These compounds have all  
265 been described recently; however, this is the first time they have been shown to be produced in *S.*  
266 *venezuelae*, as their previous characterization required expression in a heterologous *Streptomyces* host  
267 (Thanapipatsiri *et al.*, 2016; Inahashi *et al.*, 2017).

268 Further examination of the soluble metabolites of 3, 4 and 5 day cultures grown in MYM  
269 medium yielded ESI(+) (electrospray ionization) metabolome profiles that were compared using XCMS, a  
270 tool to identify, quantify, and compare metabolite profiles across samples (Smith *et al.*, 2006). While  
271 there were a multitude of new and enriched metabolites produced by the *lsr2* mutant, we focussed our  
272 attention on the most abundant compounds (intensities greater than  $10^5$ ). Within these highly abundant  
273 metabolites, we identified six unique molecules produced only by the *lsr2* mutant (excluding isotopes,  
274 adducts, chemical noise and irreproducible peaks across replicates). An additional five compounds were  
275 significantly (>5×) more abundant in the *lsr2* mutant than wild type (**Table S4**). Of these new and  
276 enhanced compounds, only one was a known molecule (ferrioxamine), produced by a well-conserved  
277 cluster under *Lsr2* control (**Table 1**).

278 Included amongst the unique compounds was a novel peak of *m/z* 281 in the *lsr2* mutant (**Figure**  
279 **5D**). Based on fragmentation analysis, this compound was predicted to be *N*-acetyl-7-chloro-L-  
280 tryptophan. To determine the gene cluster responsible for producing this compound, we searched for  
281 halogenase-encoding genes. We identified *sven\_6229* as a reasonable candidate, as it was dramatically  
282 (>200×) upregulated in an *lsr2* mutant (**Table S1**). It was also part of a large, otherwise transcriptionally  
283 silent specialized metabolic gene cluster (the 'NRPS-ladderane' cluster in **Figure 3** and **Table 1**). We  
284 mutated *sven\_6229*, and found the *m/z* 281 peak disappeared (**Figure 5D**). A close homologue of  
285 SVEN\_6229, PrnA, catalyzes the conversion of L-tryptophan to 7-chloro-L-tryptophan (Dong *et al.*, 2005),  
286 and mutant PrnA variants can yield 5-chloro-L-tryptophan (Lang *et al.*, 2011). We predicted that an

287 acetylated form of one of these two chlorinated tryptophan molecules most likely corresponded to the  
288 novel  $m/z$  281 molecule identified in the *lsr2* mutant. We synthesized the two analogues, and confirmed  
289 the identity of the unknown compound as being *N*-acetyl-chlorotryptophan, by virtue of the near  
290 identical MS/MS spectra of the synthetic candidates (**Figure S9**). Interestingly, however, co-elution  
291 studies with the synthetic standards clearly demonstrated that the unknown species was neither the 5-  
292 chloro, nor the 7-chloro isomer (**Figure S9**), suggesting that it is a new tryptophan-derived precursor.

293

#### 294 **Lsr2 alters the volatile metabolome of *S. venezuelae***

295 *As S. venezuelae* also produces volatile compounds with important biological roles (Jones *et al.*,  
296 2017), we compared the volatile molecules produced by wild type and *lsr2* mutant strains. After  
297 eliminating peaks associated with the growth medium, 742 discrete peaks were detected for both  
298 strains. Of these, 65 were reproducibly differentially expressed, with 38 being more abundant in the  
299 wild type, and 27 more abundant in the *lsr2* mutant (**Figure 5E; Table S5**), suggesting that volatile  
300 metabolites may not be subject to the same regulatory controls as other specialized metabolites.  
301 Generally, those compounds present at higher levels in the wild type had terpene-like properties.  
302 Notably, a terpene-encoding cluster (*sven\_7101-7117*) was amongst a handful of metabolic clusters  
303 whose expression decreased in the absence of Lsr2 (**Table 1; Table S1**). In contrast, the volatile  
304 metabolites that were more abundant in the *lsr2* mutant appeared to be enriched for by-products of  
305 specialized metabolic precursors (*e.g.* derivatives of pyruvate and acetyl-CoA).

306

#### 307 **Modulating Lsr2 activity stimulates new metabolite production in diverse *Streptomyces* species**

308 The dramatic increase in metabolic production by the *lsr2* mutant in *S. venezuelae* prompted us  
309 to test whether it was possible to exploit this activity and stimulate new metabolite production in other  
310 streptomycetes. In *M. tuberculosis*, a dominant negative allele of *lsr2* has been reported, in which a  
311 conserved Arg residue in the C-terminal DNA-binding domain is changed to an Ala residue (Gordon *et al.*,  
312 2008). We constructed an equivalent *Streptomyces* variant (R82A mutant). Using EMSAs, we  
313 confirmed that this protein was defective in its ability to bind DNA, and that it interfered with DNA  
314 binding by the wild type protein (**Figure S10**). We also cloned this dominant negative allele behind a  
315 highly active, constitutive (*ermE\**) promoter on an integrating plasmid vector (**Figure 6A**), and  
316 introduced this 'Lsr2 knockdown' construct into wild type *S. venezuelae* to test whether it was able to  
317 phenocopy the *lsr2* mutant. Using a bioassay, we detected increased antibiotic production for this  
318 strain, relative to one carrying an empty plasmid vector (**Figure S10**). We also introduced the construct

319 into the well-studied *S. coelicolor* strain, and observed copious production of the blue pigmented  
320 metabolite actinorhodin when grown on a medium where this compound is not typically produced  
321 (**Figure 6B**). Finally, we tested the construct in a small library of wild *Streptomyces* isolates. We  
322 screened for new metabolite production using a bioassay to assess antibiotic production. We first  
323 introduced the Lsr2 knockdown construct into strain WAC4718. This led to a significant increase in  
324 growth inhibition of *M. luteus*, and new growth inhibition of *B. subtilis*, relative to the plasmid-alone  
325 control strain (**Figure 6C**). We next introduced the knockdown and control constructs into four  
326 additional wild isolates (**Figure 6D**), and tested their antibiotic production capabilities against the  
327 indicator strain *M. luteus*. We observed new and/or increased antibiotic production for two strains  
328 (WAC7072 and WAC7520), no change in growth inhibition for one strain (WAC5514), and reduced  
329 activity in the final strain (WAC6377). Notably, these strains did not grow appreciably differently  
330 compared with their empty plasmid-containing parent strain (e.g. **Figure S11**). These results suggested  
331 our construct had the ability to downregulate Lsr2 activity in a wide range of streptomycetes, and could  
332 serve as a broadly applicable means of stimulating antibiotic production in these bacteria.

333

## 334 **DISCUSSION**

335 The nucleoid-associated protein Lsr2 has been tied to virulence and environmental adaptation in  
336 *Mycobacterium*, and like H-NS in *E. coli*, it has been proposed to function to repress the expression of  
337 ‘foreign’ DNA (Gordon *et al.*, 2010; Gordon *et al.*, 2011). Here, we demonstrate a role for Lsr2 in  
338 repressing the expression of laterally acquired sequences in *Streptomyces*, as well as in suppressing the  
339 expression of antisense RNA, as has also been observed for H-NS. Uniquely in *Streptomyces*, however, it  
340 appears that Lsr2 function has been co-opted for the control of specialized metabolism, and that the  
341 cryptic/silent nature of many of these metabolic clusters is due to direct Lsr2 repression.

342

### 343 **Mechanism of Lsr2-mediated repression**

344 Previous work on Lsr2 from the mycobacteria has shown Lsr2 preferentially binds AT-rich DNA  
345 (Gordon *et al.*, 2010; Gordon *et al.*, 2011), and our findings suggest that this is also the case in the  
346 streptomycetes. Unlike more conventional transcription factors, we found that Lsr2 binding sites in *S.*  
347 *venezuelae* tended to be quite broad, centring on AT-rich sequences, extending hundreds (or thousands)  
348 of base-pairs, and frequently encompassing promoter regions (**Table S3**). In the proteobacteria, H-NS  
349 can polymerize along the chromosome (Liu *et al.*, 2010; Lim *et al.*, 2012; Ryan Will *et al.*, 2018),  
350 repressing transcription by shielding the DNA from binding by transcription factors or RNA polymerase.

351 It can also bridge disparate DNA segments (van der Valk *et al.*, 2017), repressing gene expression by  
352 trapping RNA polymerase, and/or changing the local DNA architecture. Lsr2 repression in *S. venezuelae*  
353 is consistent with both polymerization and bridging mechanisms. The larger binding sites, often  
354 associated with transcriptional changes, could be the result of Lsr2 filamentation along the chromosome  
355 in those regions. We also identified multiple specialized metabolic clusters having more than one Lsr2  
356 binding site (see **Figure 3**). This was particularly notable within the right arm of the chromosome (**Table**  
357 **1**). These sites were often smaller (**Table S3**), and it is possible that gene repression is achieved through  
358 bridging between these sites.

359 Many of the Lsr2 binding sites identified here, however, were not associated with altered  
360 transcription of their flanking genes. It is conceivable that these sites serve more of an architectural  
361 role, with Lsr2 binding promoting chromosome organization and compaction. Binding at these sites may  
362 also exert indirect effects on transcription, as a result of altered DNA structure and accessibility.

363 In this study, we focussed our attention on the DNA-binding activity of Lsr2, but it is worth  
364 noting that post-transcriptional regulatory roles have been identified for related proteins. In particular,  
365 H-NS can also bind RNA (Park *et al.*, 2010), where it stabilizes target transcripts and promotes their  
366 translation. Notably, within the differentially expressed genes identified here, Lsr2 enhanced the  
367 expression of 10% of these genes. These may be interesting candidates for future investigations aimed  
368 at understanding alternative regulatory roles for Lsr2.

369

### 370 **Role for Lsr2 repression**

371 Our results suggest that Lsr2 functions both as a 'genome sentinel', and as a central governor of  
372 specialized metabolism. It represses the expression of many genes that seem to have been recently  
373 acquired based on conservation analysis. However, it also controls the expression of many well-  
374 conserved clusters in *S. venezuelae*. It is not clear how *Streptomyces* species acquire their specialized  
375 metabolic clusters. The clustered nature of specialized metabolic genes makes them amenable to  
376 transfer between species through conjugation or transduction (*Streptomyces* are not naturally  
377 competent for DNA transformation), although genomic studies have suggested that the transfer and  
378 maintenance of entire clusters is relatively uncommon (McDonald and Currie, 2017). In many clusters,  
379 the pathway-specific regulators (Williamson *et al.*, 2006; Fernández-Martínez *et al.*, 2014) and/or  
380 resistance determinants (*e.g.* Flatt and Mahmud, 2007; Thaker *et al.*, 2013; Mak *et al.*, 2014) are  
381 encoded near the ends of the cluster. Loss of either of these genetic elements during cluster transfer to

382 a recipient could lead to inappropriate cluster expression in the absence of a fail-safe mechanism  
383 provided by proteins like Lsr2.

384         Within *S. venezuelae*, seven clusters lack an obvious pathway-specific regulator, and of these,  
385 five are under Lsr2 control. Similarly, six of nine clusters lacking an associated transporter are affected  
386 by Lsr2 (although resistance can be conferred by means other than transport, and not all specialized  
387 metabolites function extracellularly). In the streptomycetes, Lsr2 may therefore act to protect the cell  
388 from the toxic products of newly acquired clusters, until they are either integrated into existing  
389 regulatory networks, or are lost from the cell. Widely conserved clusters controlled by Lsr2 (*e.g.*  
390 siderophore/desferrioxamine and bacteriocin) likely represent instances of successful integration, where  
391 Lsr2 control has evolved such that its repression can be alleviated under appropriate conditions.  
392 However, not all specialized metabolic clusters are under Lsr2 control. The products of Lsr2-independent  
393 clusters may be important for growth under laboratory conditions (and thus any Lsr2-mediated  
394 repression may have been alleviated under our experimental conditions), or they may be largely benign  
395 and/or have a low fitness cost associated with their production. On the other end of the spectrum are  
396 the volatile compounds, many of which required Lsr2 for their production. It appears that the synthesis  
397 of these molecules may be subject to different regulatory constraints than those of the specialized  
398 metabolites.

399

#### 400 **Control of Lsr2 expression and activity**

401         As Lsr2 governs the expression of the majority of specialized metabolic clusters in *S. venezuelae*,  
402 it is critical to understand how its expression and activity are controlled. In the proteobacteria, factors  
403 that impact H-NS expression and activity have been extensively studied; however, far less known about  
404 what affects Lsr2 levels and function in the actinobacteria.

405         In the proteobacteria, *hns* expression is activated by multiple transcription factors (Falconi *et al.*,  
406 1996; La Teana *et al.*, 2006), and is negatively regulated by both small RNAs and H-NS itself (Falconi *et al.*,  
407 1993; Lalaouna *et al.*, 2015). In the actinobacteria, there is currently nothing known about the  
408 transcriptional regulation of *lsr2*, although it likely governs its own expression: there is a large Lsr2  
409 binding site that overlaps the *lsr2* promoter (Table S3), suggesting that, like H-NS, it negatively regulates  
410 its own expression. How *lsr2* expression is activated, and whether it is also subject to post-  
411 transcriptional regulation remains to be seen.

412         At a protein level, H-NS activity can be modulated by interaction with a multitude of proteins,  
413 including association with paralogous proteins like StpA (Müller *et al.*, 2010). Intriguingly, all

414 streptomycetes encode a paralogous Lsr2-like protein, termed LsrL. Our data suggest that there exists  
415 regulatory interplay between these proteins, with Lsr2 repressing *lsrL* expression. It will be interesting to  
416 see whether LsrL associates with Lsr2 to form hetero-oligomers, and whether such an association alters  
417 Lsr2 activity. Deleting *lsrL* did not have profound phenotypic consequences, at least under the  
418 conditions we tested, so understanding its biological role in *Streptomyces* will require additional  
419 investigation. Unlike the streptomycetes, the mycobacteria do not encode additional Lsr2-like proteins.  
420 However, recent work in *M. tuberculosis* has suggested that Lsr2 can associate with the unrelated  
421 nucleoid-associated protein HU (Datta *et al.*, 2019); whether an equivalent interaction occurs in  
422 *Streptomyces* has yet to be determined. Lsr2 also appears to be subject to post-translational  
423 modification, having been identified in several phospho-proteome screens conducted in *Streptomyces*  
424 *coelicolor* (Parker *et al.*, 2010; Manteca *et al.*, 2011), although how phosphorylation affects Lsr2 activity  
425 is currently unclear.

426 H-NS-mediated repression can be alleviated through competition for binding to similar  
427 sequences by other transcription factors (Will *et al.*, 2015). Equivalent ‘counter-silencing’ mechanisms  
428 have been reported for Lsr2 in the mycobacteria (Kurthkoti *et al.*, 2015). Given that at least a subset of  
429 the Lsr2-controlled specialized metabolic clusters are expressed under particular growth conditions in *S.*  
430 *venezuelae* (e.g. desferrioxamine, melanin), there must exist mechanisms to relieve Lsr2 repression in  
431 the streptomycetes as well. Intriguing candidates for this could include global antibiotic regulators, or  
432 cluster-situated regulators, and revealing how Lsr2 is integrated into the larger regulatory networks  
433 governing specialized metabolism will be a major priority.

434

### 435 **Chromosome organization and the regulation of specialized metabolism**

436 Lsr2 is one of multiple nucleoid-associated proteins encoded by the streptomycetes, including  
437 sIHF (Swiercz *et al.*, 2013), the HU proteins HupA and HupS (Salerno *et al.*, 2009), and BldC (Bush *et al.*,  
438 2019). To date, only BldC binding and regulation has been thoroughly characterized, but unlike Lsr2, its  
439 primary regulatory targets are developmental determinants, not specialized metabolic clusters.  
440 Phenotypic analyses of *sIHF* and *hupS* mutants in *S. coelicolor* revealed major sporulation defects, in  
441 contrast to the modest developmental delay observed for the *lsr2* mutant (Salerno *et al.*, 2009; Swiercz  
442 *et al.*, 2013). Both mutations also impacted metabolism, with the *sIHF* mutant exhibiting both enhanced  
443 and reduced production of pigmented antibiotics, depending on media conditions, and the *hupS* mutant  
444 failing to produce the brown spore pigment in *S. coelicolor*. While a comprehensive analysis remains to

445 be conducted, neither sIHF nor HupS appear to function like Lsr2 in exerting global control over  
446 specialized metabolism.

447 In the fungi, chromosome organization is governed by the histones which, like the nucleoid-  
448 associated proteins in bacteria, function to both compact the chromosome and control gene expression.  
449 Like *Streptomyces*, fungi possess a multitude of cryptic secondary metabolic clusters, and many of these  
450 are silenced as a result of histone activity (Keller, 2018). Successful cluster activation has been achieved  
451 by manipulating histone activity through altered acetylation or methylation (Pfannenstiel and Keller,  
452 2019).

453 Given the broad conservation of Lsr2 across the streptomycetes, and its significant impact on  
454 specialized metabolism in these bacteria, Lsr2 is an attractive candidate for activity modulation, like the  
455 histones in fungi. Deleting *lsr2* may not be feasible in all *Streptomyces*, given recent studies suggesting  
456 that it is an essential gene in some species (Najah *et al.*, 2019). However, our work here suggests that  
457 downregulating Lsr2 activity may offer an effective approach to alleviating metabolic repression, and  
458 can profoundly alter the metabolic output of a wide range of streptomycetes. Collectively, it may  
459 provide a new avenue for accessing otherwise cryptic natural products in these metabolically gifted  
460 bacteria, facilitating both our understanding of the chemical ecology associated with microbial signalling  
461 and interactions, and our ability to identify new compounds for clinical development.

462

## 463 **MATERIALS AND METHODS**

### 464 **Bacterial strains, plasmids, oligonucleotides and culture conditions**

465 All strains and plasmids/cosmids are outlined in **Table S6**, while oligonucleotide information is  
466 provided in **Table S7**. *S. venezuelae* strains were grown at 30°C on MS (soy flour-mannitol) agar, MYM  
467 (maltose yeast extract mannitol) agar, YPD (yeast-peptone-dextrose) agar, and YP (yeast-peptone) agar,  
468 or in liquid MYM medium prepared as described previously (Kieser *et al.*, 2000; Jones *et al.*, 2017). *S.*  
469 *coelicolor* strains were grown on Difco nutrient agar plates, while wild *Streptomyces* isolates were grown  
470 on ISP4 medium (Difco) supplemented with maltose (1 g/L), mannitol (1 g/L), sucrose (1 g/L) and  
471 glycerol (1 g/L), or in Bennet's medium. *E. coli* strains were grown at 37°C on or in LB (Luria-Bertani)  
472 medium or in liquid SOB (Super Optimal Broth) (Kieser *et al.*, 2000).

473

### 474 **Strain and plasmid construction**

475 An in-frame deletion of *lsr2* (*sven\_3225*) was created using the ReDirect PCR targeting method  
476 (Gust *et al.*, 2003). The *lsr2* coding region was replaced with the *aac(3)IV-oriT* resistance cassette, which



477 was subsequently excised using the yeast FLP recombinase to leave an 81 bp scar. The *aac(3)IV-oriT*  
478 cassette was amplified from pIJ773 using the primer pair Sven3225disruptF and Sven3225disruptR2 to  
479 generate an extended resistance cassette (oligonucleotide sequences listed in **Table S7**). Cosmid 1-C1  
480 (<http://strepdb.streptomyces.org.uk/>) was introduced into *E. coli* BW25113 containing pIJ790, and the  
481 *lsr2* coding region was replaced with the extended resistance cassette. Cosmid 1-C1 $\Delta$ *lsr2::aac(3)IV-oriT*  
482 was confirmed both via PCR using the flanking primers sven3225F2 and sven3225R2, and through a  
483 diagnostic restriction digest. The modified cosmid was then introduced into *S. venezuelae* by  
484 conjugation. Two representative apramycin-resistant, kanamycin-sensitive null mutants were selected  
485 for morphological analysis. Cosmid 1-C1 $\Delta$ *lsr2::aac(3)IV-oriT* was introduced into *E. coli* BT340 in which  
486 the FLP recombinase was induced to excise the *aac(3)IV-oriT* cassette from the cosmid. The cosmid  
487 backbone was then targeted to replace *bla* with the *hyg-oriT* cassette from pIJ10701 (Gust *et al.*, 2004).  
488 The resulting cosmid was checked using PCR (**Table S7**) and restriction digest, prior to being mobilised  
489 into *S. venezuelae*  $\Delta$ *lsr2::aac(3)IV-oriT*. Hygromycin-resistant exconjugants were selected, and then  
490 screened for a double cross-over event resulting in apramycin-sensitive, hygromycin-sensitive scarred  
491 mutants that were confirmed by PCR (**Table S7**).

492 *S. venezuelae*  $\Delta$ *lsr2* was complemented through cloning *lsr2*, together with 257 bp upstream and  
493 293 bp downstream flanking sequences, into the *EcoRV*-digested integrative plasmid pIJ82. Gene  
494 synthesis (GenScript) was used to generate a C-terminal triple FLAG-tagged variant  
495 (DYKDHDGDYKDHDIDYKDDDDK, separated from the *Lsr2* sequence by a triple glycine linker) bearing the  
496 same upstream and downstream sequences as the native complementation construct. This synthesized  
497 sequence was flanked by *Bgl*III sites, which facilitated subcloning into the *Bam*HI site of the integrative  
498 plasmid pIJ10706 (pIJ82 and pIJ10706 are identical except that pIJ10706 uses the *aac(3)IV* promoter to  
499 drive expression of *hyg*). Both *lsr2*-carrying plasmids were introduced individually into the *lsr2* mutant  
500 and assessed for their ability to complement the developmental delay observed on solid MYM.

501 An in-frame deletion of *lsrL* (*sven\_3832*) was created using the ReDirect PCR targeting method  
502 (Gust *et al.*, 2003) described above. The *lsrL* coding region was replaced with the *aac(3)IV-oriT* resistance  
503 cassette in cosmid 4E19 and conjugated from the non-methylating *E. coli* strain ET12567 (MacNeil *et al.*,  
504 1992) containing pUZ8002 (Paget *et al.*, 1999) into *S. venezuelae*. Two representative apramycin-  
505 resistant, kanamycin-sensitive null mutants were confirmed by PCR (**Table S7**) and were subjected to  
506 morphological and metabolic analyses.

507 To mutate *sven\_6229*, CRISPR-Cas-mediated mutagenesis was used (Cobb *et al.*, 2015), with  
508 minor alterations to the published protocol. Briefly, a 32 nucleotide deletion, along with an in-frame

509 stop codon, was introduced into *sven\_6229*. The guide RNA sequence was cloned into the *Bsbl* site of  
510 pCRISPomyces2, following the annealing of the overlapping oligonucleotides Sven6229 GuideF and  
511 Sven6229 GuideR (**Table S7**). The editing template was generated by first amplifying fragments  
512 upstream (Sven6229 UpF/R) and downstream (Sven6229 DownF/R) of the guide RNA sequences. These  
513 sequences were then joined by overlap extension PCR, before being digested and cloned into the *XbaI*  
514 site of the guide RNA-carrying pCRISPomyces vector. Sequence integrity of both the guide RNA and  
515 editing template was confirmed by sequencing. The resulting plasmid was conjugated into the *lsr2*  
516 mutant (**Table S6**), and exconjugants were selected for using apramycin and nalidixic acid. Colonies were  
517 then streaked on MS agar plates without antibiotic supplementation, and were screened for the desired  
518 deletion using the Sven6229 GuideF and Sven6229 DownR primers. Candidate deletion mutants were  
519 subjected to a final PCR check, using Sven6229 UpR and Sven6229 ConR, and the resulting product was  
520 sequenced to confirm the mutation.

521 To investigate the effects of AT-content on Lsr2 binding and gene expression, we focussed on a  
522 validated Lsr2 binding site between *sven\_5106* and *sven\_5107*, where the expression of these genes was  
523 increased upon loss of Lsr2, suggesting Lsr2 repression. To clone a ~9 kb DNA fragment spanning  
524 *sven\_5105-5107*, the TOPO® TA cloning kit was used as per the manufacture's instructions. Briefly, the  
525 fragment was amplified using the Phusion proofreading polymerase (New England Biolabs) with  
526 oligonucleotides Sven5105\_5107F and Sven5105\_5107R (**Table S7**), a 72°C annealing temperature, and  
527 cosmid Sv-3-D04 (**Table S6**) as template. The amplified product was purified by gel extraction, and was  
528 then incubated with *Taq* polymerase and dATP at 72°C for 15 min. Four microlitres of the resulting A-  
529 tailed product were mixed with salt solution and pCR®2.1-TOPO® vector provided in the cloning kit,  
530 before being introduced into Subcloning Efficiency™ DH5α™ competent cells (ThermoFisher  
531 Scientific). The *sven\_5105-5107* containing plasmid was verified using restriction enzyme digestion and  
532 sequencing. To create mutant variants, synthetic gene fragments were generated and amplified using  
533 oligonucleotides Sven5106\_5107F and Sven5106\_5107R (**Table S7**). The amplified products were cloned  
534 between unique *NheI* and *AvrII* sites within the *sven5105-07* sequences. The designed mutations were  
535 confirmed by restriction digestion and sequencing. All validated *sven\_5105-5107* variants (wild type  
536 and mutants) were excised from the TOPO vector using *XbaI* and *SpeI*, and cloned into the *SpeI* site of  
537 pRT801. Constructs were then conjugated into wild type *S. venezuelae* and  $\Delta$ *lsr2* mutant strains (for  
538 expression analysis), and the  $\Delta$ *lsr2* mutant strains complemented with either *lsr2* or *lsr2-3xFLAG* (for  
539 CHIP analyses).

540

#### 541 ***Streptomyces* cell extract preparation, SDS-PAGE, and immunoblotting**

542 Cell extracts were prepared from a 1 mL aliquot of *S. venezuelae* cells grown in liquid MYM  
543 medium. The protein extracts were separated using 15% SDS-PAGE and were stained with Coomassie  
544 brilliant blue R-250. Equivalent amounts of total protein were loaded onto a second 15% SDS-PAGE, and  
545 following transfer to PVDF membranes, were subjected to immunoblotting with anti-FLAG antibody  
546 (1:1,500; Sigma) and anti-rabbit IgG horseradish peroxidase (HRP)-conjugated secondary antibodies  
547 (1:3,000; Cell Signaling).

548

#### 549 **Lsr2 overexpression, purification and electrophoretic mobility shift assays (EMSAs)**

550 *lsr2* amplified using primers NdeISven3225F and BamHISven3225R (**Table S7**) was digested and  
551 the product cloned into similarly digested pET15b (**Table S7**). After sequencing, this construct was  
552 introduced into *E. coli* Rosetta cells (**Table S7**). Overexpression of 6×His-*lsr2* was achieved by growing  
553 cultures at 37°C to an OD<sub>600</sub> of 0.5, and then adding 0.5 mM IPTG (isopropyl β-D-1-  
554 thiogalactopyranoside). Cells were grown for a further 3 h at 30°C before harvesting and resuspending in  
555 binding buffer (50 mM NaH<sub>2</sub>PO<sub>4</sub>, 300 mM NaCl and 10 mM imidazole, pH 8.0) containing 1 mg/mL  
556 lysozyme and one complete mini EDTA-free protease inhibitor pellet (Roche). Cell suspensions were  
557 incubated on ice for 20 min before sonication. 6×His-Lsr2 was purified by binding to 1 mL Ni-NTA  
558 agarose (Invitrogen), after which the resin was collected and the bound protein was washed with  
559 binding buffer supplemented with increasing concentrations of imidazole. Purified proteins were  
560 ultimately eluted using 500 mM imidazole. Purified protein was exchanged into storage buffer (20 mM  
561 Tris-HCl, pH 8, 150 mM NaCl, 25% glycerol and 1.4 mM β-mercaptoethanol) using an Amicon Ultra-15  
562 Centrifugal Filter with a 3 kDa cut-off. Bradford assays were conducted to measure protein  
563 concentrations.

564 EMSAs were performed using 124 – 280 bp probes amplified by PCR and 5'-end-labelled with [γ-  
565 <sup>32</sup>P]dATP (primers prefixed “emsa” are listed in **Table S7**). Increasing concentrations of Lsr2 (0–5 μM)  
566 were combined with either 1 or 10 nM probe, 1 mg/mL bovine serum albumin (BSA) and binding buffer  
567 (10 mM Tris, pH 7.8, 5 mM MgCl<sub>2</sub>, 60 mM KCl and 10% glycerol). Each reaction was incubated for 10 min  
568 at room temperature, followed by 30 min on ice prior to adding a glycerol-based loading dye and  
569 running on a 12% native polyacrylamide gel. To test binding specificity, competition assays were  
570 established in which increasing concentrations (0-160 nM) of unlabeled probe were added together with  
571 4 nM labelled probe and 1 μM Lsr2, to the EMSA reactions described above. Gels were exposed to a  
572 phosphor plate for 1 h, before being visualized using a phosphorimager (Typhoon FLA 9500).

573

#### 574 **RNA isolation and RT-(q)PCR**

575 Wild type *S. venezuelae* and the  $\Delta$ *lsr2* mutant strain were grown in 300 mL MYM cultures in  
576 duplicate. After 8 h (vegetative growth), 12 h (early mycelial fragmentation) and 18 hours (late mycelial  
577 fragmentation/ sporulation), density at OD<sub>450</sub> was measured, and a 60-90 mL sample was harvested.  
578 Subsequent experiments involved growing wild type and  $\Delta$ *lsr2* mutant strains carrying *sven\_5105-*  
579 *sven\_5107* variants on an integrating plasmid. These strains were grown in duplicate, in 50 mL MYM  
580 liquid medium for 18 h. In all cases, RNA was isolated as described in Moody *et al.* (Moody *et al.*, 2013),  
581 using a modified guanidium thiocyanate protocol (Chomczynski and Sacchi, 1987). Primers HrdBF and  
582 HrdBR, or SVEN4987F/SVEN4987R (**Table S7**) were used for PCR checks, alongside a quantified  
583 chromosomal DNA control, to confirm any DNA contamination was <0.005%.

584 Reverse transcription (RT) reactions were performed as described previously (Haiser *et al.*, 2009;  
585 Moody *et al.*, 2013). In brief, gene-specific reverse primers (**Table S7**), or random oligonucleotides were  
586 annealed to 1 µg of total RNA prior to cDNA synthesis using SuperScript® III reverse transcriptase  
587 (Invitrogen) (wild type and mutant) or Lunascript™ RT (New England Biolabs) (*sven5105-5107* variants),  
588 respectively.

589 To validating RNA-sequencing results, two microlitres of the resulting cDNA were used as  
590 template DNA for PCR, with a 58°C annealing temperature. The number of cycles was optimized to  
591 ensure that amplification was occurring within the linear range of the reaction (33 cycles for *sven\_0514*,  
592 *sven\_6216*, *sven\_6264* and *hrdB* and 30 cycles for *sven\_0493* and *sven\_5135*). Negative control  
593 reactions were run to confirm the absence of genomic DNA contamination in the RNA samples, and  
594 involved adding an equivalent volume of a reverse transcription reaction in which nuclease free water  
595 had been added in place of reverse transcriptase. All reverse transcription reactions and PCR  
596 amplifications were carried out in duplicate, using RNA isolated from two independent cultures.

597 For the *sven\_5105-5107* variant-containing strains, 2.5 µL of cDNA (1:4) were used as template  
598 for qPCR. Primers 5106F/5106R were used to amplify target gene from cDNA with a 55°C annealing  
599 temperature. 'No RT' samples were run to confirm no DNA contamination. All samples were assessed in  
600 biological duplicate and technical triplicate. qPCR data were normalized to *rpoB* and were analyzed using  
601 a relative quantification method ( $2^{-\text{DDC}_T}$ ) (Livak and Schmittgen, 2001).

602

#### 603 **RNA-seq sample preparation and data analysis**

604 Library construction and sequencing were performed by the Farncombe Metagenomics Facility,

605 McMaster University, Hamilton, Canada. Total RNA (1.7  $\mu$ g) from each sample was subjected to rRNA  
606 depletion using RiboZero (Epicentre), as per the manufacturer's instructions. Library preparation was  
607 performed using the NEBNext Ultra Directional RNA Library Prep Kit (NEB), including double-AMPure  
608 bead (Beckman Coulter) size selection. Following quality control, libraries were pooled in equimolar  
609 amounts and sequenced over two lanes of the HiSeq 1500 using the TruSeq Rapid (v1) chemistry with  
610 onboard cluster generation and a 1 $\times$ 75 bp protocol.

611 Raw sequencing reads were trimmed to remove low-quality 3' ends using PrinSeq (Schmieder  
612 and Edwards, 2011). Trimmed reads were checked for quality using FastQC  
613 ([www.bioinformatics.babraham.ac.uk/projects/fastqc/](http://www.bioinformatics.babraham.ac.uk/projects/fastqc/)) and aligned to the *S. venezuelae* ATCC 10712  
614 genome sequence using Bowtie2 (Langmead *et al.*, 2009).

615 The resultant SAM files were converted to BAM format, sorted by genomic position and indexed  
616 to create bai files (Li *et al.*, 2009). The BAM files were analyzed both visually using Integrated Genomics  
617 Viewer (Version 2.3.60) (Robinson *et al.*, 2011), and using Rockhopper2 (Tjaden, 2015). We assigned a  
618 cut-off for significance using a *p*-value adjusted for multiple testing that was less than 0.01 (*q*-value), and  
619 filtered for genes displaying a fold change greater than four.

620

### 621 **Chromatin immunoprecipitation**

622 *S. venezuelae*  $\Delta$ *lsr2* was complemented using an integrating plasmid (pIJ10706/pIJ82) carrying  
623 either wild type *lsr2* or *lsr2-3 $\times$ FLAG* (Table S6). Each culture was then grown in 300 mL MYM cultures in  
624 duplicate. After 18 h, the density at OD<sub>450</sub> was measured and the developmental progression of each  
625 strain was monitored by light microscopy. A 1 mL sample was then taken for immunoblot analysis, and  
626 an 80 mL sample was transferred to a sterile flask. Formaldehyde was added to a final concentration of  
627 1% (vol/vol) to cross-link protein to DNA, after which cultures were incubated for a further 30 min.  
628 Glycine was then added to a final concentration of 125 mM. Immunoprecipitation was carried out as  
629 described in Bush *et al.* (Bush *et al.*, 2013), using Anti-FLAG (DYKDDDDK) affinity gel (BioTools).  
630 Immunoprecipitation, and subsequent sequencing, were done in duplicate.

631 Library construction and sequencing were performed by the Farncombe Metagenomics Facility,  
632 McMaster University, Hamilton, Canada. The NEBNext Ultra DNA Library Prep Kit was used for library  
633 preparation, starting with 10 ng of the sheared ChIP DNA and including a double-AMPure bead  
634 (Beckman Coulter) size selection. Following quality control, libraries were pooled in equimolar amounts  
635 and sequenced on one MiSeq run using a 2 $\times$ 75 bp (v3) configuration.

636

## 637 **ChIP-seq data analysis**

638 The reads in the fastq files were first checked for quality using FastQC  
639 ([www.bioinformatics.babraham.ac.uk/projects/fastqc/](http://www.bioinformatics.babraham.ac.uk/projects/fastqc/)), then aligned to the *S. venezuelae* ATCC 10712  
640 genome (GenBank accession number NC\_018750) using Bowtie2 (Langmead *et al.*, 2009). The resultant  
641 SAM files were converted to BAM format, sorted by genomic position and indexed to create BAI files (Li  
642 *et al.*, 2009). The BAM files were visualized using Integrated Genomics Viewer (Version 2.3.60)  
643 (Robinson *et al.*, 2011), and were subjected to quantitative analysis.

644 *MACS2* was run from the command line to normalize all *Isr2* and the *Isr2-3xFLAG* samples  
645 against total DNA with the mappable genome size set at  $7.92 \times 10^6$  (90% of the *S. venezuelae* genome) to  
646 generate BED files (Zhang *et al.*, 2008). The BED files were in turn used to generate a CSV sample sheet  
647 that was read into the R package for statistical computing (Team, 2013) using the *read* function of the  
648 *DiffBind* package (Stark and Brown, 2011). The *dba.count* function of the *DiffBind* package was used to  
649 calculate a binding matrix with scores based on read counts for each sample. The *dba.contrast* function  
650 of the *DiffBind* package was then used to compare the *Isr2* (negative control) samples with the *Isr2-*  
651 *3xFLAG* samples. The *dba.analyze* function of the *DiffBind* package was used to run an *edgeR* analysis  
652 that identified sites that were significantly differentially bound [having a *p*-value adjusted for multiple  
653 testing that was less than 0.01 (*q*-value)]. These differentially bound sites were retrieved using the  
654 *dba.report* function.

655

## 656 **ChIP-quantitative PCR**

657 Strains were grown in 10 mL of MYM medium overnight, before being subcultured in duplicate  
658 into 50 mL of MYM medium. After incubating for 18 h, formaldehyde was added to a final concentration  
659 of 1% (v/v) to cross-link protein to DNA. The cultures were incubated for an additional 30 min, at which  
660 time glycine was added to a final concentration of 125 mM. Immunoprecipitation was performed as  
661 described above, only using the FLAG M2 antibody (Sigma).

662 To quantify the abundance of target genes of interest in the ChIP DNA, 20  $\mu$ L qPCR reactions  
663 were prepared using Luna<sup>®</sup> Universal qPCR Master Mix (New England Biolabs) and 2.5  $\mu$ L of ChIP DNA  
664 (1:10) as template. Primers 0926F/0926R and 5105F/5105R (**Table S7**) were used to amplify target gene  
665 from ChIP DNA with a 55°C annealing temperature. qPCR data was then analyzed using DART-PCR  
666 (Peirson *et al.*, 2003).

667

## 668 **Phylogenetic analysis of *Streptomyces* species**

669 Phylogenetic analysis was conducted based on the concatenated protein sequences encoded by  
670 selected single-copy phylogenetic marker genes *serS*, *rpoB*, *secY*, and *rplB*. These sequences were  
671 extracted from the complete genome sequences of the different streptomycetes, as well as from an  
672 outgroup (*Bacillus subtilis*), all of which were accessed using the NCBI database. Alignments were  
673 generated using ClustalX2 (Larkin *et al.*, 2007) using a neighbor joining cluster algorithm, with iteration  
674 at each alignment step and 1000 bootstrap replications. The phylogenetic tree was visualised using  
675 FigTree v1.4 (<http://tree.bio.ed.ac.uk/software/figtree>).

676

### 677 **Specialized metabolite extraction and analysis**

678 *S. venezuelae* WT and  $\Delta$ *lsr2* strains were grown in triplicate as a lawn on MYM agar over a  
679 timecourse of 3, 5 and 7 days. The entirety of each plate (as well as an MYM agar control) was  
680 macerated in 25 mL *n*-butanol, sonicated for 5 min in a Branson 2520 tabletop ultrasonic cleaner and  
681 shaken overnight at 4°C. The agar was removed by passing through a milk filter, then Whatman filter  
682 paper, after which the solvent was split into two aliquots and dried down in a GeneVac. The residue was  
683 reconstituted in either 500  $\mu$ L 50% methanol for bioassays, or 1 mL of 1:1 MeCN:H<sub>2</sub>O for LC-MS analysis.

684 LC-MS analysis was performed on a Waters Alliance Acquity UPLC system coupled to a Xevo  
685 G2S-QToF. A 10  $\mu$ L aliquot was taken and diluted with 90  $\mu$ L 1:1 MeCN:H<sub>2</sub>O, and 10  $\mu$ L of this diluted  
686 solution were injected onto a Phenomenex Kinetex Biphenyl column (1.7  $\mu$ m , 2.1 x 100 mm).

687 The samples were separated using a gradient of 5% to 95% acetonitrile (0.1% [vol/vol] formic  
688 acid) at 40°C over 25 min, with a flow rate of 0.4 mL/min. Positive electrospray ionization was  
689 performed and the ions were scanned over a mass range of 100 to 1200 Da. Data were analyzed using  
690 MZmine 2 software (Pluskal *et al.*, 2010).

691 For soluble metabolites, and quantitation of the known metabolites shown in Figure 4C, cultures  
692 grown in MYM liquid medium for 3, 4, or 5 days were centrifuged, and the supernatant lyophilized. The  
693 lyophile was redissolved in 10 mL of 50:50 acetonitrile/water and shaken on a rotary shaker for 1 h.  
694 After centrifugation to remove particulates, samples were analyzed on an Agilent UPLC-QTOF. Injections  
695 of 2  $\mu$ L were separated on Zorbax Eclipse plus C18 column (2.1 mm x 50 mm) and a gradient of 0-1 min  
696 isocratic 100%A, 1-17 min gradient from 100-0% A, and 17-20 min isocratic 100% B, where A is 98%  
697 water, 2% methanol, 0.1% formic acid and B is 100% methanol, 0.1% formic acid, at a flow rate of 0.4  
698 mL/min. Samples were measured in positive and negative ionization modes to gain the greatest  
699 coverage. Samples were analyzed in technical triplicates and key features were assessed in biological  
700 duplicates. Fragmentation analysis of features of interest was performed with a collision energy of 25 V.

701 Antibiotic bioassays were performed by testing methanol extracts of *S. venezuelae* grown for 1  
702 to 3 days against *Micrococcus luteus*. Twenty microliters of each extract was applied to a Whatman  
703 antibiotic assay disc and applied to a lawn of LB inoculated with a 25-fold dilution of the *M. luteus*  
704 indicator strain grown to mid-exponential phase. The plates were incubated overnight at 30°C before  
705 measuring the size of the zone of clearing. Bioassays for wild *Streptomyces* were performed by growing  
706 isolates (knockdown- and plasmid-control containing) on ISP4 supplemented medium for 6 days at 30°C.  
707 Overnight cultures of indicator strains (*M. luteus* or *B. subtilis*) were mixed 1% soft nutrient agar, which  
708 was allowed to solidify before being overlaid atop the wild *Streptomyces* strains, after which the  
709 cultures were incubated overnight at 37°C.

710

### 711 **Synthesis of N-acetyl-chloro-tryptophan standards**

712 Synthesis of *N*-acetyl-5-chloro-L-tryptophan was achieved using Wang resin (50 mg, 1 mmol/g  
713 loading), which was swollen in anhydrous dimethylformamide (DMF). Fmoc-5-chloro-L-Trp-OH (57.5 mg,  
714 0.125 mmol, 2.5 eq.) was dissolved in 5 mL 9:1 DMF:dichloromethane (DCM) and cooled to 0°C.  
715 Diisopropylcarbodiimide (DIC) (6.3 mg, 0.050 mmol, 1 eq.) was added in minimal DCM. The reaction was  
716 stirred for 30 min at 0°C, in a flask fitted with a drying tube. The anhydride mixture was added to the  
717 swollen resin, after which DMAP (0.6 mg, 5 µmol, 0.1 eq.) was added, and the flask was then periodically  
718 agitated at room temperature for 2 h. The resin was washed in 3 × 10 mL DMF, followed by 3 × 10 mL  
719 DCM. The Fmoc group was removed by the addition of 10 mL 20% (V/V) piperidine in DMF, after which  
720 the suspension was agitated for 20 min. The resin was washed as above, before acetylation was carried  
721 out with the addition of acetic anhydride (5.0 µL, 0.05 mmol, 1 eq.) and diisopropylethylamine (DIPEA)  
722 (1 µL, 5 µmol, 0.1 eq.) in 5 mL DMF. The resulting suspension was agitated for 30 min at room  
723 temperature. The resin was washed as above, prior to cleavage being carried out with 10 mL 95% TFA,  
724 2.5% triethylsilane, 2.5% DCM for 30 min. The eluent was then collected and evaporated to dryness.  
725 Analysis by LC-MS was completed without any further purification.

726 To synthesize *N*-acetyl-7-chloro-L-tryptophan, 7-chloro-L-Trp-OH (24 mg, 0.1 mmol) was  
727 dissolved in 20 µL 50 mM ammonium bicarbonate. Fifty microliters of an acetylation mixture (20 µL  
728 acetic anhydride, 60 µL methanol) were added to the amino acid, after which the mixture was agitated  
729 for 1 h at room temperature. The solvent was evaporated to dryness and the resulting product was  
730 analyzed without additional purification.

731

### 732 **Analysis of volatile metabolites**



733 Volatile metabolites in the headspace of culture supernatants were concentrated, analyzed, and  
734 relatively quantified using headspace solid-phase microextraction coupled to two-dimensional gas  
735 chromatography time-of-flight mass spectrometry (HS-SPME-GC×GC-TOFMS), as described previously  
736 (Jones *et al.*, 2017). Four millilitres of culture supernatants were transferred to 20 mL air-tight  
737 headspace vials and sealed with a PTFE/silicone cap (Sigma-Aldrich). A 2 cm triphasic solid-phase  
738 microextraction (SPME) fiber consisting of polydimethylsiloxane, divinylbenzene, and carboxen (Supelco)  
739 was suspended in the headspace of the supernatant for 30 min at 37°C with 250 rpm shaking.

740 The SPME fiber was injected into the inlet of a Pegasus 4D (LECO Corp.) GC×GC-TOFMS  
741 equipped with a rail autosampler (Gerstel), and fitted with a two-dimensional column set consisting of  
742 an Rxi-624Sil [60 m × 250 μm × 1.4 μm (length × internal diameter × film thickness)] first column and  
743 Stabilwax (Crossbond Carbowax polyethylene glycol; 1 m × 250 μm × 0.5 μm) second column (Restek). A  
744 splitless injection was performed, with the front inlet set to 270°C. The main oven containing column 1  
745 was held at 35°C for 30 s, and then ramped at 3.5°C/min to a final temperature of 230°C. The secondary  
746 oven containing column 2 and cryogenic modulator were heated in-step with the main over with +5°C  
747 and +30°C offsets, respectively. The modulation period was set at 2.0 s, with hot- and cold-pulses  
748 alternating every 0.5 s. The transfer line temperature was set at 250°C. Mass spectra were collected  
749 over a range of 30-500 *m/z*, with an acquisition rate of 200 spectra/s, an ion source temperature of  
750 200°C, and a detector voltage offset of +50 V.

751 Alignment of peaks across chromatograms was performed using the Statistical Compare feature  
752 of ChromaTOF (LECO Corp.). An inter-chromatogram mass spectral match score ≥ 600 (out of 1000) and  
753 maximum first and second dimension retention time deviations of 6 s and 0.15 s, respectively, were  
754 required for peak alignment. Only peaks detected at a signal-to-noise ratio of ≥ 50:1 in one or more  
755 chromatogram were considered for subsequent analyses. Mass spectra were compared with the  
756 National Institute of Standards and Technology (NIST) 2011 mass spectral library, and a forward match  
757 score ≥ 700 (out of 1000) was required for putative compound identification. When possible, putative  
758 identifications were affirmed by comparing experimentally-determined linear retention indices (using C<sub>6</sub>  
759 to C<sub>15</sub> straight-chain alkanes, Sigma-Aldrich) with previously-reported values for both polar and non-  
760 polar column configurations.

761 Relative compound abundances (measured in total ion chromatogram (TIC)) were log<sub>10</sub>-  
762 transformed, mean-centered, and unit scaled prior to statistical analysis. The non-parametric Mann-  
763 Whitney U-test (Mann and Whitney, 1947) with Benjamini-Hochberg correction (Benjamini and

764 Hochberg, 1995) was used to identify volatile metabolites that were significantly different in relative  
765 compound abundance ( $p < 0.05$  after correction) between WT and  $\Delta$ *lsr2* strains.

766

### 767 **Construction of Lsr2 knockdown construct**

768 We created the dominant negative R82A point mutant variant of Lsr2 using overlap extension PCR.  
769 Briefly, two products were generated using primers sven3225F/R82Asven3225R and  
770 R82Asven3225F/sven3225R (**Table S7**). The resulting products were gel purified, before being mixed  
771 together in a 1:1 molar ratio for subsequent stitching together and amplification. Amplification was  
772 achieved using phosphorylated oligonucleotides sven3225F and sven3225R. The resulting product was  
773 purified and cloned into pIJ82, and construct integrity was confirmed by sequencing. The R82A mutant  
774 variant was then re-amplified using NdeI3225F and PacI3225R (to remove its native promoter, which is  
775 subject to negative autoregulation), digested with *NdeI* and *PacI*, and cloned into the same restriction  
776 enzyme sites in pIJ12551, downstream of the constitutive, highly active *ermE\** promoter (**Tables S8** and  
777 **S9**). Construct integrity was confirmed by sequencing before being introduced by conjugation into *S.*  
778 *venezuelae*, *S. coelicolor*, and five different wild *Streptomyces* isolates from the Wright actinomycete  
779 collection (WAC4718, WAC5514, WAC6377, WAC7072, and WAC7520).

780

781

### 782 **ACKNOWLEDGEMENTS**

783 We wish to thank Michael Hewak, Talha Qureshi, Dan Seale, Lilian Raphael, and Christine Pham for  
784 technical assistance, Stephen Miller for his computational/data mining expertise, and Gerry Wright for  
785 access to his library of wild *Streptomyces* species. We are also grateful to Mervyn Bibb and Govind  
786 Chandra (John Innes Centre), Ben Evans (McMaster University), and Will Navarre and Jun Liu (University  
787 of Toronto) for helpful discussions. This work was supported by Cystic Fibrosis Canada (to JN and MAE),  
788 the Canadian Institutes of Health Research (to MAE) and the Boris Family Foundation (to MAE). E.J.G. was  
789 supported by a Department of Foreign Affairs and International Trade fellowship, and the Drug Safety  
790 and Efficacy Cross-disciplinary Training program from the Canadian Institutes of Health Research.

791

792

### 793 **REFERENCES**

794 Bailey, T.L., Boden, M., Buske, F.A., Frith, M., Grant, C.E., Clementi, L., *et al.* (2009) MEME Suite: Tools  
795 for motif discovery and searching. *Nucleic Acids Res* **37**.

796

797 Barka, E.A., Vatsa, P., Sanchez, L., Gaveau-Vaillant, N., Jacquard, C., Klenk, H.-P., *et al.* (2016) Taxonomy,

798 physiology, and natural products of actinobacteria. *Microbiol Mol Biol Rev* **80**: 1–43.  
799  
800 Benjamini, Y., and Hochberg, Y. (1995) Controlling the false discovery rate: a practical and powerful  
801 approach to multiple testing. *J R Stat Soc Ser B* **57**: 289–300.  
802  
803 Bentley, S., Chater, K., Cerdeño-Tárraga, A.-M., Challis, G.L., Thomson, N.R., James, K.D., *et al.* (2002)  
804 Complete genome sequence of the model actinomycete *Streptomyces coelicolor* A3(2). *Nature* **417**:  
805 141–147.  
806  
807 Bush, M.J., Bibb, M.J., Chandra, G., Findlay, K.C., and Buttner, M.J. (2013) Genes required for aerial  
808 growth, cell division, and chromosome segregation are targets of *whiA* before sporulation in  
809 *Streptomyces venezuelae*. *mBio* **4**: e00684-13.  
810  
811 Bush, M.J., Chandra, B., Al-Bassam, M.M., Findlay, K.C., and Buttner, M.J. (2019) BldC delays entry into  
812 development to produce a sustained period of vegetative growth in *Streptomyces venezuelae*. *mBio* **10**:  
813 pii: e02812-18.  
814  
815 Castang, S., McManus, H.R., Turner, K.H., and Dove, S.L. (2008) H-NS family members function  
816 coordinately in an opportunistic pathogen. *Proc Natl Acad Sci* **105**: 18947–18952.  
817  
818 Chandra, G., and Chater, K.F. (2014) Developmental biology of *Streptomyces* from the perspective of 100  
819 actinobacterial genome sequences. *FEMS Microbiol Rev* **38**: 345–379.  
820  
821 Chomczynski, P., and Sacchi, N. (1987) Single-step method of RNA isolation by acid guanidinium  
822 thiocyanate-phenol-chloroform extraction. *Anal Biochem* **162**: 156–159.  
823  
824 Cobb, R.E., Wang, Y., and Zhao, H. (2015) High-efficiency multiplex genome editing of *Streptomyces*  
825 species using an engineered CRISPR-Cas system. *ACS Synth Biol* **4**: 723–728.  
826  
827 Craney, A., Ahmed, S., and Nodwell, J. (2013) Towards a new science of secondary metabolism. *J*  
828 *Antibiot (Tokyo)* **66**: 387–400.  
829  
830 Dame, R.T., Noom, M.C., and Wuite, G.J.L. (2006) Bacterial chromatin organization by H-NS protein  
831 unravelled using dual DNA manipulation. *Nature* **444**: 387–390.  
832  
833 Dame, R.T., Wyman, C., and Goosen, N. (2000) H-NS mediated compaction of DNA visualised by atomic  
834 force microscopy. *Nucleic Acids Res* **28**: 3504–3510.  
835  
836 Daniel-Ivad, M., Hameed, N., Tan, S., Dhanjal, R., Socko, D., Pak, P., *et al.* (2017) An engineered allele of  
837 *afsQ1* facilitates the discovery and investigation of cryptic natural products. *ACS Chem Biol* **12**: 628–634.  
838  
839 Datta, C., Jha, R.K., Ahmed, W., Ganguly, S., Ghosh, S., and Nagaraja, V. (2019) Physical and functional  
840 interaction between nucleoid-associated proteins HU and Lsr2 of *Mycobacterium tuberculosis* : altered  
841 DNA binding and gene regulation. *Mol Microbiol* doi: 10.1111/mmi.14202.  
842  
843 Dong, C., Flecks, S., Unversucht, S., Haupt, C., Pée, K.-H. van, and Naismith, J.H. (2005) Tryptophan 7-  
844 halogenase (PrnA) structure suggests a mechanism for regioselective chlorination. *Science* **309**: 2216–  
845 2219.

- 846  
847 Dorman, C.J. (2007) H-NS, the genome sentinel. *Nat Rev Microbiol* **5**: 157–161.  
848
- 849 Dorman, C.J. (2014) H-NS-like nucleoid-associated proteins, mobile genetic elements and horizontal  
850 gene transfer in bacteria. *Plasmid* **75**: 1–11.  
851
- 852 Falconi, M., Brandi, A., La Teana, A., Gualerzi, C.O., and Pon, C.L. (1996) Antagonistic involvement of FIS  
853 and H-NS proteins in the transcriptional control of *hns* expression. *Mol Microbiol* **19**: 965–975.  
854
- 855 Falconi, M., Higgins, N.P., Spurio, R., Pon, C.L., and Gualerzi, C.O. (1993) Expression of the gene encoding  
856 the major bacterial nucleoid protein H-NS is subject to transcriptional auto-repression. *Mol Microbiol* **10**:  
857 273–282.  
858
- 859 Fernández-Martínez, L.T., Borsetto, C., Gomez-Escribano, J.P., Bibb, M.J., Al-Bassam, M.M., Chandra, G.,  
860 and Bibb, M.J. (2014) New insights into chloramphenicol biosynthesis in *Streptomyces venezuelae* ATCC  
861 10712. *Antimicrob Agents Chemother* **58**: 7441–7450.  
862
- 863 Flärdh, K., and Buttner, M.J. (2009) *Streptomyces* morphogenetics: dissecting differentiation in a  
864 filamentous bacterium. *Nat Rev Microbiol* **7**: 36–49.  
865
- 866 Flatt, P.M., and Mahmud, T. (2007) Biosynthesis of aminocyclitol-aminoglycoside antibiotics and related  
867 compounds. *Nat Prod Rep* **24**: 358–392.  
868
- 869 Gao, C., Hindra, Mulder, D., Yin, C., and Elliot, M.A. (2012) Crp is a global regulator of antibiotic  
870 production in *Streptomyces*. *mBio* **3**: pii: e00407-12.  
871
- 872 Gordon, B.R.G., Imperial, R., Wang, L., Navarre, W.W., and Liu, J. (2008) Lsr2 of *Mycobacterium*  
873 represents a novel class of H-NS-like proteins. *J Bacteriol* **190**: 7052–7059.  
874
- 875 Gordon, B.R.G., Li, Y., Cote, A., Weirauch, M.T., Ding, P., Hughes, T.R., *et al.* (2011) Structural basis for  
876 recognition of AT-rich DNA by unrelated xenogeneic silencing proteins. *Proc Natl Acad Sci* **108**: 10690–  
877 10695.  
878
- 879 Gordon, B.R.G., Li, Y., Wang, L., Sintsova, A., Bakel, H. van, Tian, S., *et al.* (2010) Lsr2 is a nucleoid-  
880 associated protein that targets AT-rich sequences and virulence genes in *Mycobacterium tuberculosis*.  
881 *Proc Natl Acad Sci* **107**: 5154–5159.  
882
- 883 Gust, B., Challis, G.L., Fowler, K., Kieser, T., and Chater, K.F. (2003) PCR-targeted *Streptomyces* gene  
884 replacement identifies a protein domain needed for biosynthesis of the sesquiterpene soil odor  
885 geosmin. *Proc Natl Acad Sci U S A* **100**: 1541–1546.  
886
- 887 Gust, B., Chandra, G., Jakimowicz, D., Yuqing, T., Bruton, C.J., and Chater, K.F. (2004)  $\lambda$  Red-mediated  
888 genetic manipulation of antibiotic-producing *Streptomyces*. *Adv Appl Microbiol* **54**: 107–128.  
889
- 890 Haiser, H.J., Yousef, M.R., and Elliot, M.A. (2009) Cell wall hydrolases affect germination, vegetative  
891 growth, and sporulation in *Streptomyces coelicolor*. *J Bacteriol* **191**: 6501–6512.  
892
- 893 Hopwood, D.A. (2007) *Streptomyces in Nature and Medicine: The Antibiotic Makers*. Oxford University

- 894 Press.  
895  
896 Inahashi, Y., Zhou, S., Bibb, M.J., Song, L., Al-Bassam, M.M., Bibb, M.J., and Challis, G.L. (2017)  
897 Watasemycin biosynthesis in *Streptomyces venezuelae*: thiazoline C-methylation by a type B radical-SAM  
898 methylase homologue. *Chem Sci* **8**: 2823–2831.  
899  
900 Jones, S.E., Ho, L.K., Rees, C.A., Hill, J.E., Nodwell, J.R., and Elliot, M.A. (2017) Streptomyces exploration  
901 is triggered by fungal interactions and volatile signals. *eLife* **6**: e21738.  
902  
903 Keller, N.P. (2019) Fungal secondary metabolism: regulation, function and drug discovery. *Nat Rev*  
904 *Microbiol* **17**: 167-180.  
905  
906 Kieser, T., Bibb, M.J., Buttner, M.J., Chater, K.F., and Hopwood, D.A. (2000) *Practical Streptomyces*  
907 *Genetics*. The John Innes Foundation, Norwich, U.K.  
908  
909 Kurthkoti, K., Tare, P., Paitchowdhury, R., Gowthami, V.N., Garcia, M.J., Colangeli, R., *et al.* (2015) The  
910 mycobacterial iron-dependent regulator IdeR induces ferritin (bfrB) by alleviating Lsr2 repression. *Mol*  
911 *Microbiol* **98**: 864–877.  
912  
913 Lalaouna, D., Morissette, A., Carrier, M.C., and Massé, E. (2015) DsrA regulatory RNA represses both hns  
914 and rbsD mRNAs through distinct mechanisms in *Escherichia coli*. *Mol Microbiol* **98**: 357–369.  
915  
916 Lang, A., Polnick, S., Nicke, T., William, P., Patallo, E.P., Naismith, J.H., and Pée, K.H. Van (2011) Changing  
917 the regioselectivity of the tryptophan 7-halogenase PrnA by site-directed mutagenesis. *Angew Chemie -*  
918 *Int Ed* **50**: 2951–2953.  
919  
920 Langmead, B., Trapnell, C., Pop, M., and Salzberg, S.L. (2009) Bowtie: An ultrafast memory-efficient short  
921 read aligner. *Genome Biol* **10**: R25.  
922  
923 Larkin, M.A., Blackshields, G., Brown, N.P., Chenna, R., McGettigan, P.A., McWilliam, H., *et al.* (2007)  
924 Clustal W and Clustal X version 2.0. *Bioinformatics* **23**: 2947–2948.  
925  
926 Li, H., Handsaker, B., Wysoker, A., Fennell, T., Ruan, J., Homer, N., *et al.* (2009) The Sequence Alignment  
927 / Map format and SAMtools. *Bioinformatics* **25**: 2078–2079.  
928  
929 Lim, C.J., Lee, S.Y., Kenney, L.J., and Yan, J. (2012) Nucleoprotein filament formation is the structural  
930 basis for bacterial protein H-NS gene silencing. *Sci Rep* **2**: 509.  
931  
932 Liu, G., Chater, K.F., Chandra, G., Niu, G., and Tan, H. (2013) Molecular regulation of antibiotic  
933 biosynthesis in streptomyces. *Microbiol Mol Biol Rev* **77**: 112–43.  
934  
935 Liu, Y., Chen, H., Kenney, L.J., and Yan, J. (2010) A divalent switch drives H-NS/DNA-binding  
936 conformations between stiffening and bridging modes. *Genes Dev* **24**: 339–344.  
937  
938 Livak, K.J., and Schmittgen, T.D. (2001) Analysis of relative gene expression data using real-time  
939 quantitative PCR and the 2(-Delta Delta C(T)) method. *Methods* **25**: 402–408.  
940  
941 Lucchini, S., Rowley, G., Goldberg, M.D., Hurd, D., Harrison, M., and Hinton, J.C.D. (2006) H-NS mediates

- 942 the silencing of laterally acquired genes in bacteria. *PLoS Pathog* **2**: 0746–0752.
- 943
- 944 MacNeil, D.J., Gewain, K.M., Ruby, C.L., Dezeny, G., Gibbons, P.H., and MacNeil, T. (1992) Analysis of  
945 *Streptomyces avermitilis* genes required for avermectin biosynthesis utilizing a novel integration vector.  
946 *Gene* **111**: 61–68.
- 947
- 948 Mak, S., Xu, Y., and Nodwell, J.R. (2014) The expression of antibiotic resistance genes in antibiotic-  
949 producing bacteria. *Mol Microbiol* **93**: 391–402.
- 950
- 951 Mann, H.B., and Whitney, D.R. (1947) On a test of whether one of 2 random variables is stochastically  
952 larger than the other. *Ann Math Stat* **18**: 50–60.
- 953
- 954 Manteca, A., Ye, J., Sánchez, J., and Jensen, O.N. (2011) Phosphoproteome analysis of *Streptomyces*  
955 development reveals extensive protein phosphorylation accompanying bacterial differentiation. *J*  
956 *Proteome Res* **10**: 5481–5492.
- 957
- 958 McDonald, B.R., and Currie, C.R. (2017) Lateral gene transfer dynamics in the ancient bacterial genus  
959 *Streptomyces*. *MBio* **8**: pii: e00644-17.
- 960
- 961 McKenzie, N.L., and Nodwell, J.R. (2007) Phosphorylated AbsA2 negatively regulates antibiotic  
962 production in *Streptomyces coelicolor* through interactions with pathway-specific regulatory gene  
963 promoters. *J Bacteriol* **189**: 5284–5292.
- 964
- 965 Moody, M.J., Young, R.A., Jones, S.E., and Elliot, M.A. (2013) Comparative analysis of non-coding RNAs in  
966 the antibiotic-producing *Streptomyces* bacteria. *BMC Genomics* **14**: 558.
- 967
- 968 Müller, C.M., Schneider, G., Dobrindt, U., Emödy, L., Hacker, J., and Uhlin, B.E. (2010) Differential effects  
969 and interactions of endogenous and horizontally acquired H-NS-like proteins in pathogenic *Escherichia*  
970 *coli*. *Mol Microbiol* **75**: 280–293.
- 971
- 972 Najah, S., Saulnier, C., Pernodet, J.L., and Bury-Mone, S. (2019) Design of a generic CRISPR-Cas9  
973 approach using the same sgRNA to perform gene editing at distinct loci. *BMC Biotechnol* **19**: 18.
- 974
- 975 Navarre, W.W. (2006) Selective silencing of foreign DNA with low GC content by the H-NS protein in  
976 *Salmonella*. *Science* **313**: 236–238.
- 977
- 978 Navarre, W.W., McClelland, M., Libby, S.J., and Fang, F.C. (2007) Silencing of xenogeneic DNA by H-NS -  
979 Facilitation of lateral gene transfer in bacteria by a defense system that recognizes foreign DNA. *Genes*  
980 *Dev* **21**: 1456–1471.
- 981
- 982 Ochi, K., and Hosaka, T. (2013) New strategies for drug discovery: Activation of silent or weakly  
983 expressed microbial gene clusters. *Appl Microbiol Biotechnol* **97**: 87–98.
- 984
- 985 Onaka, H. (2017) Novel antibiotic screening methods to awaken silent or cryptic secondary metabolic  
986 pathways in actinomycetes. *J Antibiot* **70**: 865–870.
- 987
- 988 Paget, M.S.B., Chamberlin, L., Atrih, A., Foster, S.J., and Buttner, M.J. (1999) Evidence that the  
989 extracytoplasmic function sigma factor  $\sigma^E$  is required for normal cell wall structure in *Streptomyces*

- 990 *coelicolor* A3(2). *J Bacteriol* **181**: 204–211.  
991  
992 Park, H.S., Östberg, Y., Johansson, J., Wagner, E.G.H., and Uhlin, B.E. (2010) Novel role for a bacterial  
993 nucleoid protein in translation of mRNAs with suboptimal ribosome-binding sites. *Genes Dev* **24**: 1345–  
994 1350.  
995  
996 Parker, J.L., Jones, A.M.E., Serazetdinova, L., Saalbach, G., Bibb, M.J., and Naldrett, M.J. (2010) Analysis  
997 of the phosphoproteome of the multicellular bacterium *Streptomyces coelicolor* A3(2) by  
998 protein/peptide fractionation, phosphopeptide enrichment and high-accuracy mass spectrometry.  
999 *Proteomics* **10**: 2486–2497.  
1000  
1001 Peirson, S.N. (2003) Experimental validation of novel and conventional approaches to quantitative real-  
1002 time PCR data analysis. *Nucleic Acids Res* **31**: e73.  
1003  
1004 Petkau, A., Stuart-Edwards, M., Stothard, P., and Domselaar, G. van (2010) Interactive microbial genome  
1005 visualization with GView. *Bioinformatics* **26**: 3125–3126.  
1006  
1007 Pfannenstiel, B.T., and Keller, N.P. (2019) On top of biosynthetic gene clusters: How epigenetic  
1008 machinery influences secondary metabolism in fungi. *Biotechnol Adv* pii: S0734-9750(19)30012-6.  
1009  
1010 Pluskal, T., Castillo, S., Villar-Briones, A., and Oresic, M. (2010) MZmine 2: modular framework for  
1011 processing, visualizing, and analyzing mass spectrometry-based molecular profile data. *BMC*  
1012 *Bioinformatics* **11**: 395.  
1013  
1014 Rigali, S., Titgemeyer, F., Barends, S., Mulder, S., Thomae, A.W., Hopwood, D.A., and Wezel, G.P. van  
1015 (2008) Feast or famine: the global regulator DasR links nutrient stress to antibiotic production by  
1016 *Streptomyces*. *EMBO Rep* **9**: 670–675.  
1017  
1018 Robinson, J.T., Thorvaldsdóttir, H., Winckler, W., Guttman, M., Lander, E.S., Getz, G., and Mesirov, J.P.  
1019 (2011) Integrative genomics viewer. *Nat Biotechnol* **29**: 24–26.  
1020  
1021 Ryan Will, W., Whitham, P.J., Reid, P.J., and Fang, F.C. (2018) Modulation of H-NS transcriptional  
1022 silencing by magnesium. *Nucleic Acids Res* **46**: 5717–5725.  
1023  
1024 Salerno, P., Larsson, J., Bucca, G., Laing, E., Smith, C.P., and Flärdh, K. (2009) One of the two genes  
1025 encoding nucleoid-associated HU proteins in *Streptomyces coelicolor* is developmentally regulated and  
1026 specifically involved in spore maturation. *J Bacteriol* **191**: 6489–6500.  
1027  
1028 Scharf, D.H., and Brakhage, A.A. (2013) Engineering fungal secondary metabolism: A roadmap to novel  
1029 compounds. *J Biotechnol* **163**: 179–183.  
1030  
1031 Schmieder, R., and Edwards, R. (2011) Quality control and preprocessing of metagenomic datasets.  
1032 *Bioinformatics* **27**: 863–864.  
1033  
1034 Singh, S.S., Singh, N., Bonocora, R.P., Fitzgerald, D.M., Wade, J.T., and Grainger, D.C. (2014) Widespread  
1035 suppression of intragenic transcription initiation by H-NS. *Genes Dev* **28**: 214–219.  
1036  
1037 Smith, C.A., Want, E.J., O’Maille, G., Abagyan, R., and Siuzdak, G. (2006) XCMS: Processing mass

- 1038 spectrometry data for metabolite profiling using nonlinear peak alignment, matching, and identification.  
1039 *Anal Chem* **78**: 779–787.
- 1040
- 1041 Smits, W.K., and Grossman, A.D. (2010) The transcriptional regulator Rok binds A+T-rich DNA and is  
1042 involved in repression of a mobile genetic element in *Bacillus subtilis*. *PLOS Genet* **6**: e1001207.
- 1043
- 1044 Stark, R., and Brown, G. (2011) *DiffBind*: differential binding analysis of ChIP-Seq peak data.  
1045 <https://bioconductor.org/packages/release/bioc/html/DiffBind.html>.
- 1046
- 1047 Swiercz, J.P., Nanji, T., Gloyd, M., Guarné, A., and Elliot, M.A. (2013) A novel nucleoid-associated protein  
1048 specific to the actinobacteria. *Nucleic Acids Res* **41**.
- 1049
- 1050 Team, R.C. (2013) R: A language and environment for statistical computing. <http://www.r-project.org/>.
- 1051
- 1052 La Teana, A., Brandi, A., Falconi, M., Spurio, R., Pon, C.L., and Gualerzi, C.O. (2006) Identification of a  
1053 cold shock transcriptional enhancer of the *Escherichia coli* gene encoding nucleoid protein H-NS. *Proc*  
1054 *Natl Acad Sci* **88**: 10907–10911.
- 1055
- 1056 Thaker, M.N., Wang, W., Spanogiannopoulos, P., Waglechner, N., King, A.M., Medina, R., and Wright,  
1057 G.D. (2013) Identifying producers of antibacterial compounds by screening for antibiotic resistance. *Nat*  
1058 *Biotechnol* **31**: 922–927.
- 1059
- 1060 Thanapipatsiri, A., Gomez-Escribano, J.P., Song, L., Bibb, M.J., Al-Bassam, M., Chandra, G., *et al.* (2016)  
1061 Discovery of unusual biaryl polyketides by activation of a silent *Streptomyces venezuelae* biosynthetic  
1062 gene cluster. *ChemBioChem* **17**: 2189–2198.
- 1063
- 1064 Tjaden, B. (2015) De novo assembly of bacterial transcriptomes from RNA-seq data. *Genome Biol* **16**: 1.
- 1065
- 1066 Valk, R.A. van der, Vreede, J., Qin, L., Moolenaar, G.F., Hofmann, A., Goosen, N., and Dame, R.T. (2017)  
1067 Mechanism of environmentally driven conformational changes that modulate H-NS DNA-bridging  
1068 activity. *eLife* **6**: pii: e27369.
- 1069
- 1070 Wang, R., Mast, Y., Wang, J., Zhang, W., Zhao, G., Wohleben, W., *et al.* (2013) Identification of two-  
1071 component system AfsQ1/Q2 regulon and its cross-regulation with GlnR in *Streptomyces coelicolor*. *Mol*  
1072 *Microbiol* **87**: 30–48.
- 1073
- 1074 Wezel, G.P. van, and McDowall, K.J. (2011) The regulation of the secondary metabolism of  
1075 *Streptomyces*: new links and experimental advances. *Nat Prod Rep* **28**: 1311–1333.
- 1076
- 1077 Will, W.R., Navarre, W.W., and Fang, F.C. (2015) Integrated circuits: How transcriptional silencing and  
1078 counter-silencing facilitate bacterial evolution. *Curr Opin Microbiol* **8**–13.
- 1079
- 1080 Williamson, N.R., Fineran, P.C., Leeper, F.J., and Salmond, G.P.C. (2006) The biosynthesis and regulation  
1081 of bacterial prodiginines. *Nat Rev Microbiol* **4**: 887–899.
- 1082
- 1083 Yoon, V., and Nodwell, J.R. (2014) Activating secondary metabolism with stress and chemicals. *J Ind*  
1084 *Microbiol Biotechnol* **41**: 415–424.
- 1085



- 1086 Zhang, Y., Liu, T., Meyer, C.A., Eeckhoute, J., Johnson, D.S., Bernstein, B.E., *et al.* (2008) Model-based  
1087 analysis of CHIP-seq (MACS). *Genome Biol* **9**: R137.  
1088  
1089 Ziemert, N., Lechner, A., Wietz, M., Millan-Aguinaga, N., Chavarria, K.L., and Jensen, P.R. (2014) Diversity  
1090 and evolution of secondary metabolism in the marine actinomycete genus *Salinispora*. *Proc Natl Acad*  
1091 *Sci* **111**: E1130–E1139.  
1092

1093 **Table 1. Specialized metabolic clusters and their control by Lsr2**

| Predicted specialized metabolic gene cluster#<br>(characterized product) | 1st gene         | Last gene        | Number of upregulated genes<br>( <i>q</i> -value <0.01;<br>>4 fold change) | % of upregulated genes in each cluster | Number of Lsr2-associated sites<br>( <i>q</i> -value <0.01)      |
|--------------------------------------------------------------------------|------------------|------------------|----------------------------------------------------------------------------|----------------------------------------|------------------------------------------------------------------|
| Ectoine                                                                  | SVEN_0223        | SVEN_0234        | 1                                                                          | 8.33                                   | 0                                                                |
| Terpene                                                                  | SVEN_0261        | SVEN_0306        | 1                                                                          | 0                                      | 0                                                                |
| <b>T1PKS-T3PKS-NRPS<br/>(venemycin/watasemycin/<br/>thiazostatin)</b>    | <b>SVEN_0463</b> | <b>SVEN_0531</b> | <b>28</b>                                                                  | <b>42.65</b>                           | <b>2 (SVEN_0502*, 506)</b>                                       |
| <b>Lantipeptide – terpene</b>                                            | <b>SVEN_0540</b> | <b>SVEN_0561</b> | <b>0</b>                                                                   | <b>0</b>                               | <b>1 (SVEN_0557)</b>                                             |
| Lantipeptide ( <i>venezuelin</i> )                                       | SVEN_0612        | SVEN_0630        | 3 (1 repressed)                                                            | 16.67                                  | 0                                                                |
| Indole ( <i>acryriaflavin</i> )                                          | SVEN_0755        | SVEN_0772        | 0                                                                          | 0                                      | 0                                                                |
| <b>Chloramphenicol</b>                                                   | <b>SVEN_0913</b> | <b>SVEN_0928</b> | <b>14</b>                                                                  | <b>93.33</b>                           | <b>1 (SVEN_0926)</b>                                             |
| Other                                                                    | SVEN_1844        | SVEN_1884        | 0                                                                          | 0                                      | 0                                                                |
| <b>Siderophore<br/>(desferrioxamine-like)</b>                            | <b>SVEN_2566</b> | <b>SVEN_2577</b> | <b>5</b>                                                                   | <b>41.67</b>                           | <b>1 (SVEN_2576)</b>                                             |
| <b>Lasso peptide</b>                                                     | <b>SVEN_3103</b> | <b>SVEN_3132</b> | <b>2</b>                                                                   | <b>6.90</b>                            | <b>1 (SVEN_3116*-7)</b>                                          |
| <b>Other</b>                                                             | <b>SVEN_4061</b> | <b>SVEN_4110</b> | <b>1</b>                                                                   | <b>2.04</b>                            | <b>1 (SVEN_4069-70)</b>                                          |
| Butyrolactone ( <i>gaburedin</i> )                                       | SVEN_4179        | SVEN_4189        | 0                                                                          | 0                                      | 0                                                                |
| <b>Melanin</b>                                                           | <b>SVEN_4620</b> | <b>SVEN_4662</b> | <b>0</b>                                                                   | <b>0</b>                               | <b>4 (SVEN_4629-30, 4632, 4634-5, 4651)</b>                      |
| <b>Butyrolactone</b>                                                     | <b>SVEN_5076</b> | <b>SVEN_5111</b> | <b>3</b>                                                                   | <b>11.54</b>                           | <b>2 (SVEN_5091-92, 5106*-07)</b>                                |
| <b>Thiopeptide</b>                                                       | <b>SVEN_5119</b> | <b>SVEN_5145</b> | <b>3</b>                                                                   | <b>11.54</b>                           | <b>3 (SVEN_5127-8, 5129-31, 5132-3)</b>                          |
| T3pks                                                                    | SVEN_5351        | SVEN_5383        | 0                                                                          | 0                                      | 0                                                                |
| Siderophore                                                              | SVEN_5413        | SVEN_5426        | 0                                                                          | 0                                      | 0                                                                |
| Siderophore                                                              | SVEN_5471        | SVEN_5482        | (1 repressed)                                                              | 9.09                                   | 0                                                                |
| <b>Bacteriocin</b>                                                       | <b>SVEN_5817</b> | <b>SVEN_5840</b> | <b>3</b>                                                                   | <b>15.15</b>                           | <b>1 (SVEN_5817*)</b>                                            |
| <b>Butyrolactone – T2PKS</b>                                             | <b>SVEN_5951</b> | <b>SVEN_6002</b> | <b>19</b>                                                                  | <b>45.10</b>                           | <b>6 (SVEN_5963*-4, 5968*-9, 5972-3, 5974, 5975-6, 5979)</b>     |
| <b>Other</b>                                                             | <b>SVEN_6112</b> | <b>SVEN_6204</b> | <b>3 (1 repressed)</b>                                                     | <b>3.26</b>                            | <b>1 (SVEN_6199)</b>                                             |
| <b>NRPS-ladderane</b>                                                    | <b>SVEN_6134</b> | <b>SVEN_6282</b> | <b>50</b>                                                                  | <b>36.49</b>                           | <b>7 (SVEN_6199, 6216-7, 6219-20, 6225*, 6230, 6247-8, 6251)</b> |
| <b>Terpene</b>                                                           | <b>SVEN_6436</b> | <b>SVEN_6490</b> | <b>6</b>                                                                   | <b>16.67</b>                           | <b>1 (SVEN_6458)</b>                                             |
| Bacteriocin                                                              | SVEN_6527        | SVEN_6535        | (1 repressed)                                                              | 0                                      | 0                                                                |
| T2PKS                                                                    | SVEN_6767        | SVEN_6814        | 2                                                                          | 4.26                                   | 0                                                                |
| Melanin                                                                  | SVEN_6833        | SVEN_6842        | 4                                                                          | 44.44                                  | 0                                                                |
| NRPS                                                                     | SVEN_7032        | SVEN_7080        | 0                                                                          | 0                                      | 0                                                                |
| <b>Terpene</b>                                                           | <b>SVEN_7101</b> | <b>SVEN_7119</b> | <b>(2 repressed)</b>                                                       | <b>0</b>                               | <b>1 (SVEN_7109-10*)</b>                                         |
| <b>T3PKS</b>                                                             | <b>SVEN_7223</b> | <b>SVEN_7259</b> | <b>1</b>                                                                   | <b>2.78</b>                            | <b>2 (SVEN_7235, 7237*-8)</b>                                    |
| <b>Terpene-NRPS</b>                                                      | <b>SVEN_7417</b> | <b>SVEN_7452</b> | <b>0</b>                                                                   | <b>0</b>                               | <b>4 (SVEN_7427-8, 7440, 7447-9, 7449-50)</b>                    |

1094 #: Cluster prediction by antiSMASH; \* Asterisks indicate regulatory genes bound by Lsr2

1095 **Bold: clusters containing an Lsr2 binding site**

1096 *Grey shading: clusters containing differentially expressed genes*

1097 **FIGURE LEGENDS**

1098

1099 **Figure 1. Expression and phenotypic analyses of *lsr2* and *lsrL* in *S. venezuelae*.**

1100 **(A)** Growth curves and developmental stages (as determined using light microscopy) of wild type (WT),  
1101 and the three different *lsr2/lsrL* mutants, over a 40 h time course in MYM liquid medium.

1102 **(B)** Comparing development (left) and melanin/brown pigment production (right – underside of plate) of  
1103 wild type (WT), versus single ( $\Delta$ *lsr2* and  $\Delta$ *lsrL*) and double ( $\Delta$ *lsr2* $\Delta$ *lsrL*) mutant strains after 2 d growth on  
1104 MYM agar medium. The white colour of the *lsr2*-containing mutants reflects aerial hyphae formation,  
1105 while the darker colour associated with the wild type and *lsrL* mutant strains indicates culture  
1106 sporulation.

1107 **(C)** Comparative transcript levels (RPKM = reads per kilobase per million) for *lsr2* and *lsrL* at three time  
1108 points [T1, T2, T3, representing the three developmental stages indicated in (A)] in liquid MYM medium,  
1109 as assessed using RNA-sequencing data. Data are presented as mean  $\pm$  standard deviation ( $n = 2$ ).

1110

1111 **Figure 2. Composition of *S. venezuelae* chromosome in relation to Lsr2 binding sites and differentially**  
1112 **affected genes.**

1113 **(A)** Panels are described from the bottom up. Bottom panels: coding sequences and relative strand  
1114 organization (forward orientation shown in red; reverse orientation shown in blue) across the *S.*  
1115 *venezuelae* chromosome, with left arm, core and right arm regions indicated. Above that, the regions  
1116 shown with black bars indicate the relative position of predicted phage genes, while those in yellow  
1117 indicate the location of specialized metabolic clusters. The light blue bars represent genes whose  
1118 expression is significantly upregulated in the *lsr2* mutant (fold change indicated), while the pink bars  
1119 indicate Lsr2 binding sites, as determined by ChIP-seq. The top panel depicts the GC content of the  
1120 chromosome, relative to the average percentage (72.4%). The peaks above the middle line indicate a GC  
1121 content above 72.4%, while those below indicate a GC content below 72.4%. Image was generated using  
1122 GView (Petkau *et al.*, 2010).

1123 **(B)** Binding sites within the left arm (pink), core (green) or right arm (blue), and relative proportion of  
1124 sites associated with transcriptional changes (no change in transcription=darker colour; change in  
1125 transcription=lighter colour). Shown within each segment is the number of binding sites associated with  
1126 that region.

1127 **(C)** Size of binding sites (in base pairs, bp) in each of the chromosome regions, separated into those  
1128 associated with altered transcription (change), versus not (no change). Colour scheme is as described in  
1129 (B). The average binding site size for each group is indicated by the vertical black line.

1130  
1131 **Figure 3. Lsr2 binding sites and expression analysis of select Lsr2-regulated specialized metabolic**  
1132 **clusters.** For each of the six specialized metabolic clusters shown, genes oriented in the forward  
1133 direction are shown as pink boxes, while those in the reverse direction are shown as blue boxes. Select  
1134 genes are labelled with their corresponding *sven* numbers (e.g. 0481). RNA-sequencing results are  
1135 shown above each cluster, with graphs depicting expression levels. For each, the *Lsr2* read profile is  
1136 shown on the top, while the wild type profile is shown on the bottom. The ChIP-seq profiles (below the  
1137 gene cluster) are shown as 'fold increase', with the grey profiles indicating regions associated with  
1138 3×FLAG-tagged Lsr2 (where an anti-FLAG antibody was used for the immunoprecipitation), and the black  
1139 profile representing the negative control (strain expressing a non-FLAG-tagged Lsr2 variant). Lsr2-  
1140 3×FLAG binding sites are indicated with a red asterisk.

1141  
1142 **Figure 4. Conservation of specialized metabolic clusters in diverse streptomycetes.** Phylogenetic tree  
1143 of diverse *Streptomyces* species, with the relative conservation of each specialized metabolic cluster  
1144 from *S. venezuelae* shown in the right. Conservation is based on BLAST analyses, with <20% (white), 20%  
1145 (light pink), 40% (medium pink) and 60% (dark pink) indicating query coverage and overall degree of  
1146 cluster conservation. Clusters bound by Lsr2 are indicated with bolded names and solid circles, while  
1147 those not bound by Lsr2 are depicted with dotted circles.

1148  
1149 **Figure 5. Specialized and volatile metabolite comparisons between wild type and *Lsr2* mutant strains.**  
1150 **(A)** Bioactivity of *S. venezuelae* extracts against *Micrococcus luteus*. Wild type and *Lsr2* mutant strains  
1151 were cultured for 18 h prior to extraction in methanol and reconstitution in DMSO. Extracts were  
1152 applied to Whatman filter discs, alongside a chloramphenicol positive control.  
1153 **(B)** Extracted ion chromatogram for chloramphenicol ( $m/z$  321.005), from LC/MS analysis of methanol  
1154 extracts from wild type and *Lsr2* mutant cultures grown in MYM liquid medium for 3 d, alongside a  
1155 medium (MYM) control.  
1156 **(C)** Extracted ion chromatograms of  $[M-H]^- = 219.040$  (venemycin);  $[M-H]^- = 252.992$  (chlorinated  
1157 venemycin);  $[M + H]^+ = 353.099$  (watasemycin); and  $[M + H]^+ = 339.083$  (thiazostatin), from LC/MS  
1158 analyses of methanol extracts of wild type and *Lsr2* mutant strains grown for 3 d in MYM liquid medium.  
1159 **(D)** Extracted ion chromatogram of  $m/z$  281.068, from LC/MS analysis of methanol extracts of wild type,  
1160 *Lsr2* mutant and double *Lsr2 sven\_6229* mutant strains, grown in MYM liquid medium for 3 d.

1161 **(E)** Heat map depicting the 65 volatile compounds (columns) that were significantly different in relative  
1162 abundance ( $p < 0.05$  after BH correction) between wild type (WT, red) and *lsr2* mutant ( $\Delta$ *lsr2*, blue)  
1163 strains. Sterile media (Media, green) is included for comparison. Cell color corresponds to relative  
1164 compound abundance after  $\log_{10}$ -transformation, mean-centering, and unit-scaling, ranging from low  
1165 abundance (blue) to high abundance (red). Dendrogram (left) was constructed using Euclidean distance  
1166 as the distance metric.

1167

1168 **Figure 6. Manipulating Lsr2 activity can stimulate new antibiotic production in diverse *Streptomyces*.**

1169 **(A)** Lsr2 activity ‘knockdown’ construct, where a DNA-binding defective variant of Lsr2 (*lsr2\**) is under  
1170 the control of a constitutive (*ermE\**) promoter, and is on a plasmid vector bearing an apramycin  
1171 resistance marker, that is capable of integrating into the chromosomes of most, if not all,  
1172 streptomycetes.

1173 **(B)** Growth of *Streptomyces coelicolor* on Difco nutrient agar. Top left, wild type; top right: wild type  
1174 carrying the empty plasmid; bottom: replicates of wild type carrying the plasmid with dominant negative  
1175 *lsr2\** variant.

1176 **(C)** Antibiotic bioassay using the wild *Streptomyces* strain WAC4718, bearing either the control (empty)  
1177 plasmid (C), or the Lsr2 knockdown construct (\*), tested against the indicator strains *M. luteus* (MI) or  
1178 *Bacillus subtilis* (Bs). Error bars indicate standard error ( $n=4$ ).

1179 **(D)** Antibiotic bioassay using four different wild *Streptomyces* strains (WAC5514, WAC6377, WAC7072,  
1180 and WAC7520), carrying either empty plasmid (C) or the Lsr2 knockdown construct (\*), tested against *M.*  
1181 *luteus* as an indicator strain. Error bars indicate standard error ( $n=4$ ).

1182

**A**

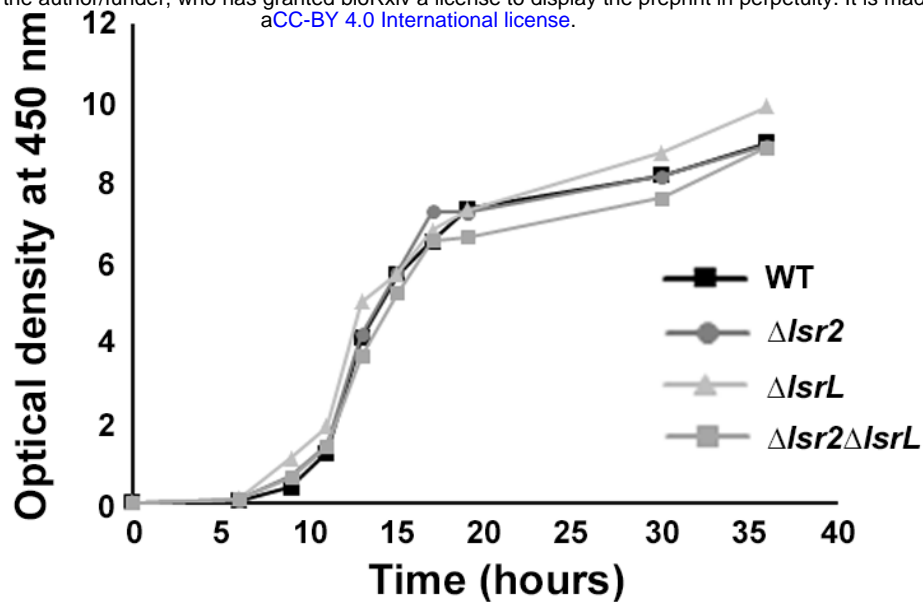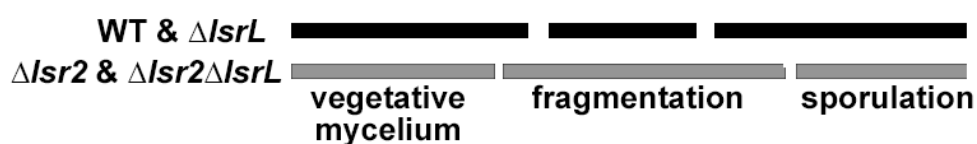

**B**

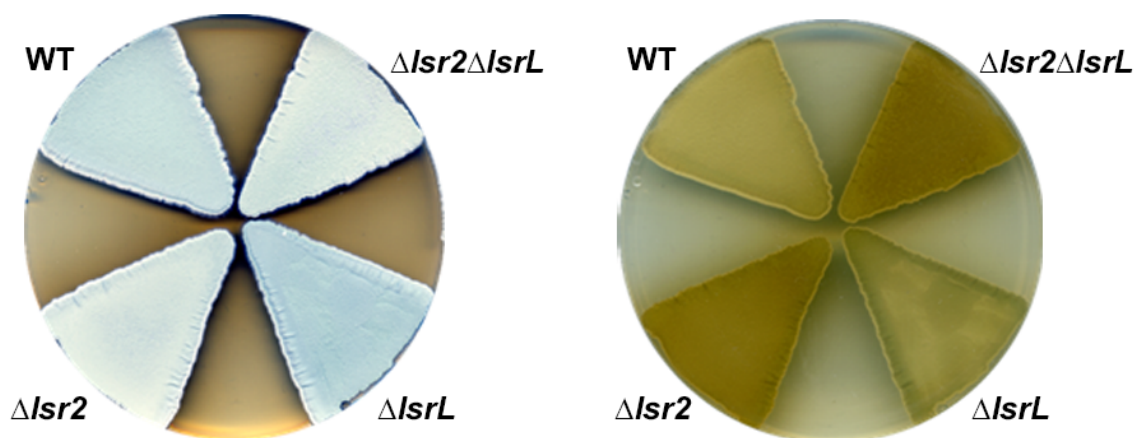

**C**

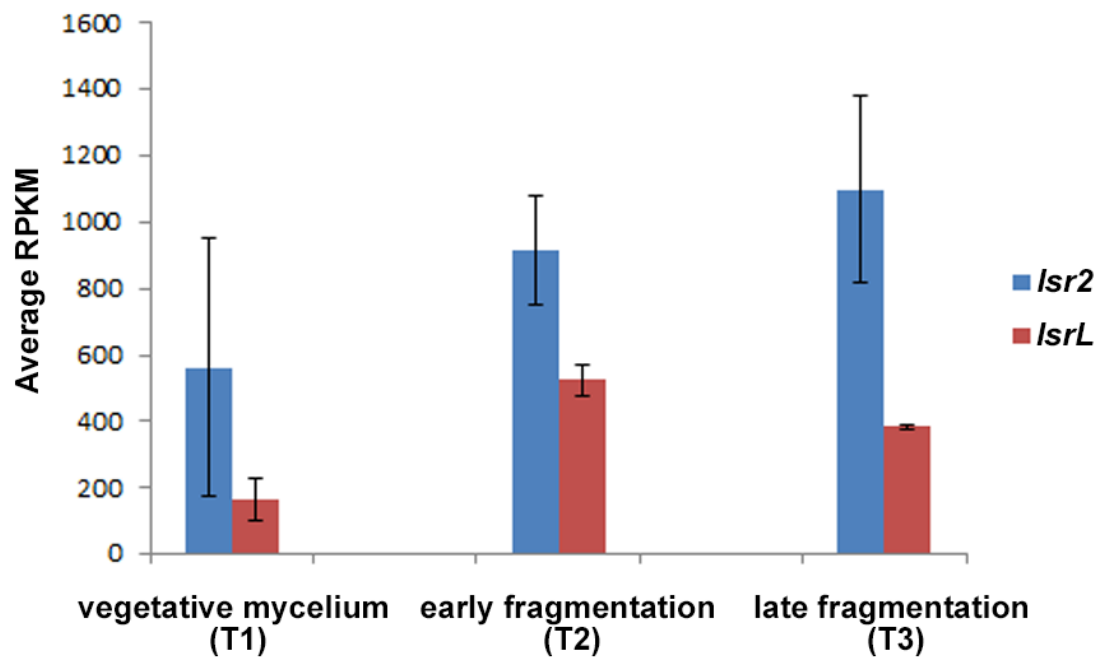

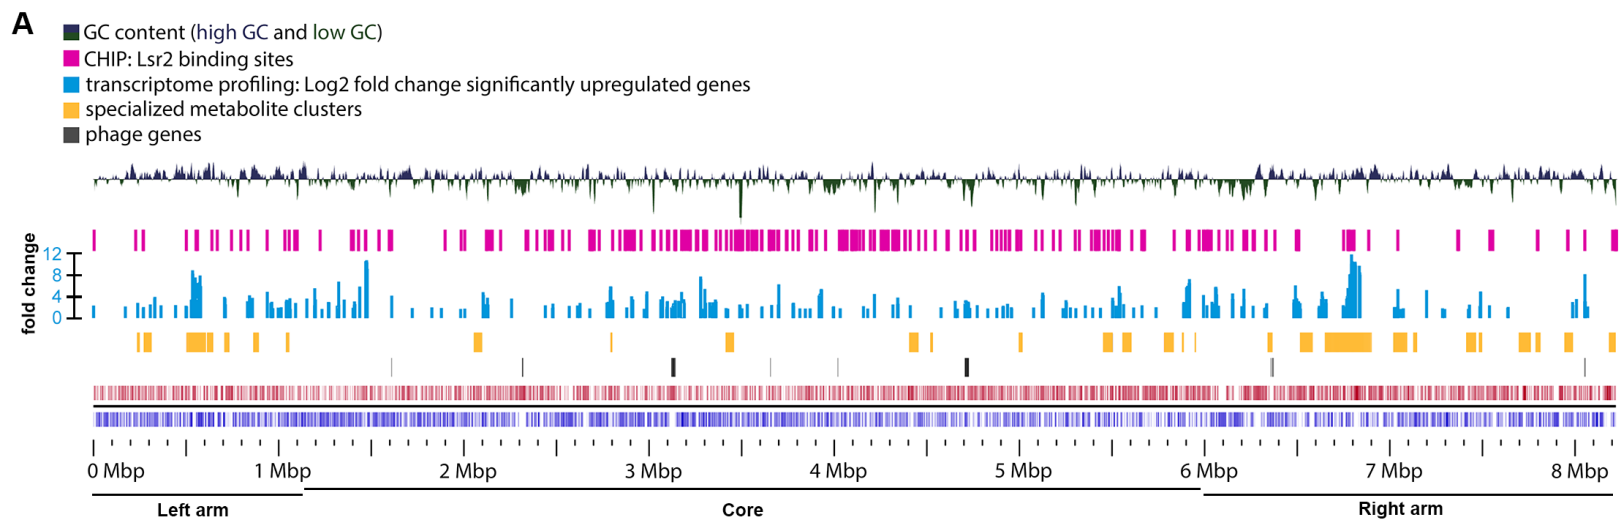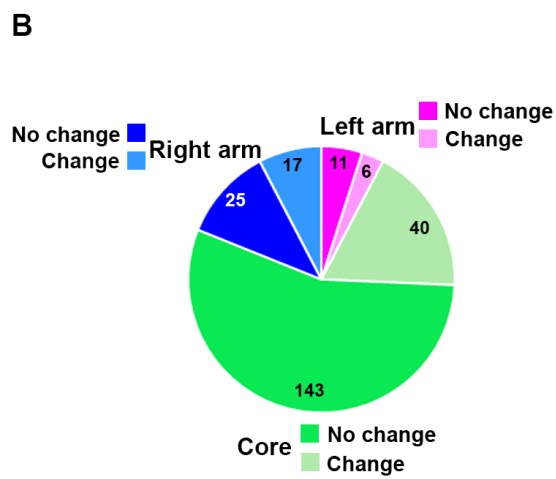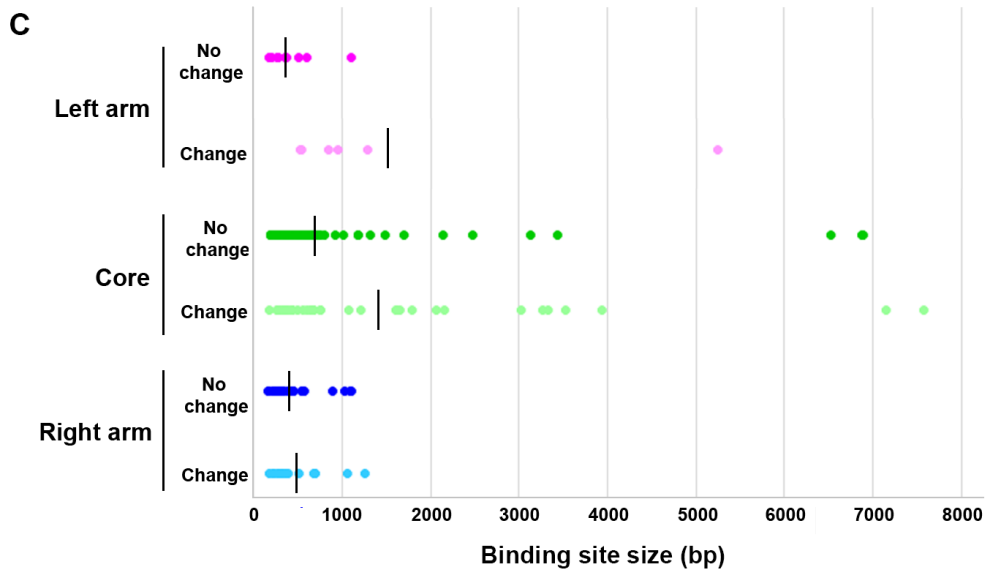

### Type I PKS/Type 3 PKS/NRPS

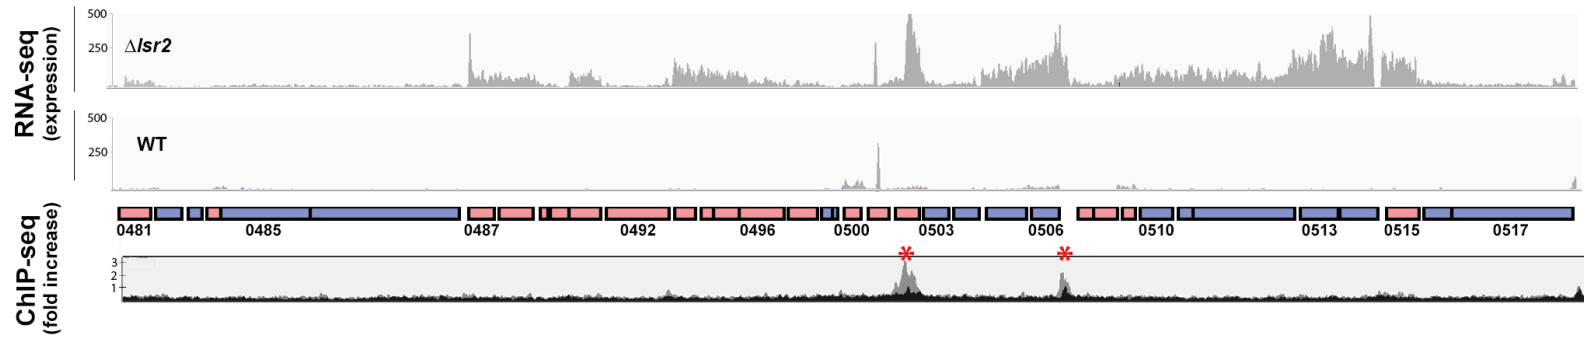

### Chloramphenicol

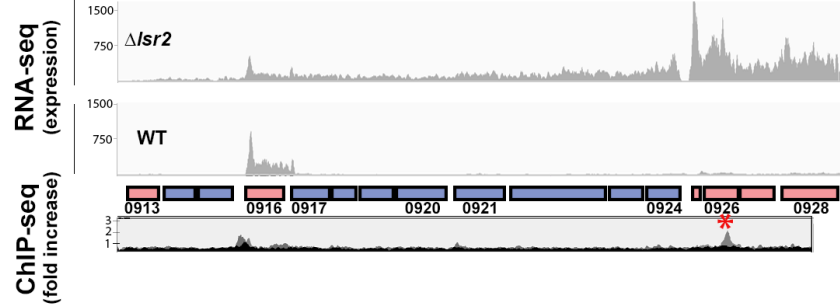

### Siderophore

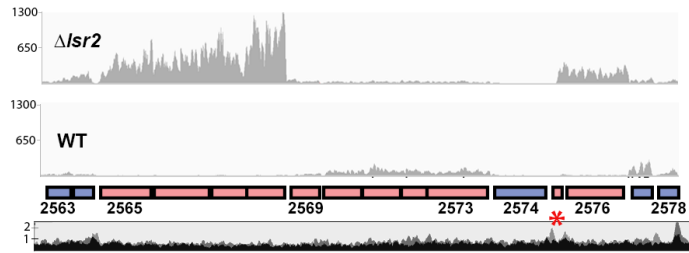

### NRPS

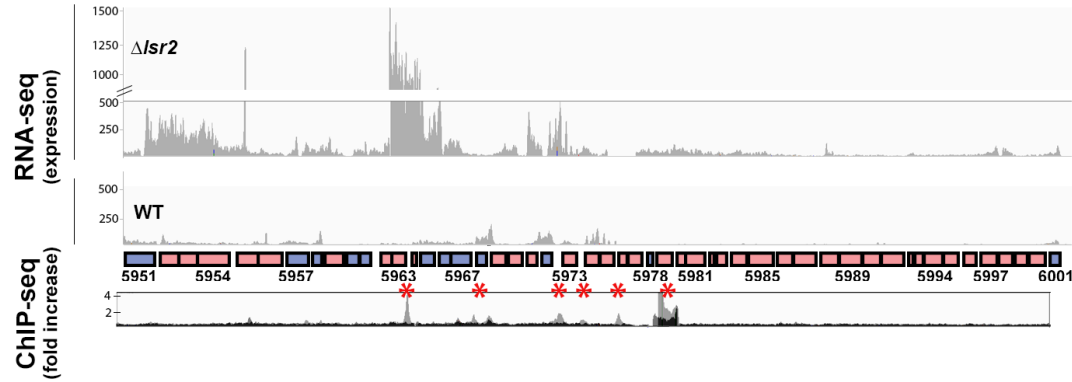

### Melanin

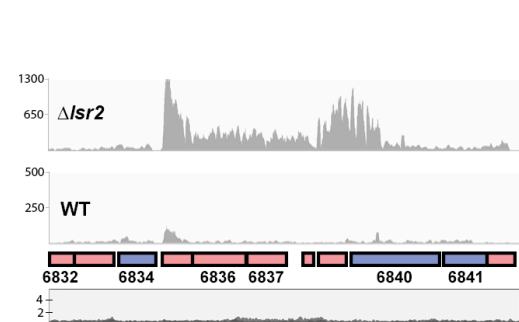

### NRPS-ladderane

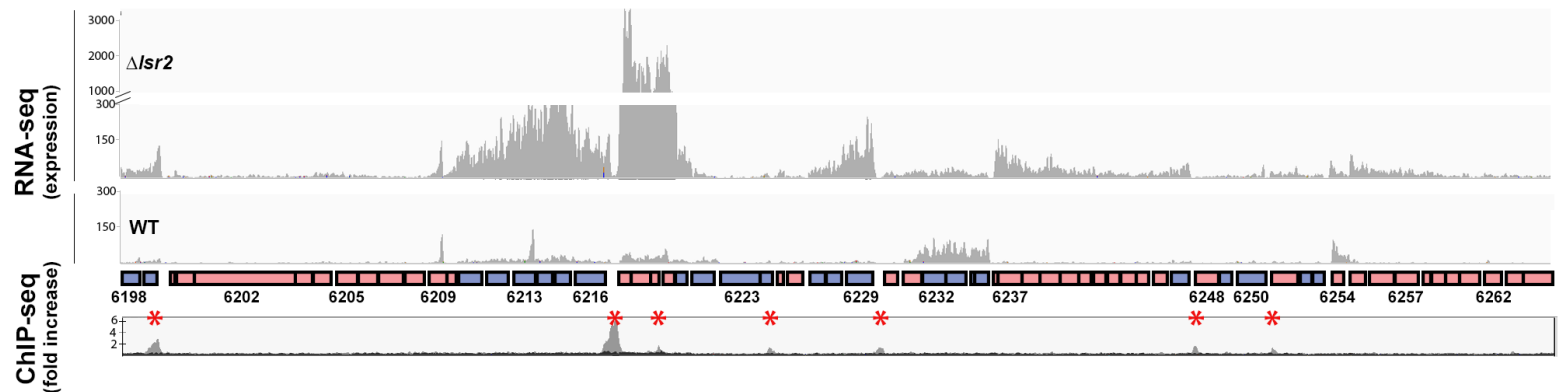



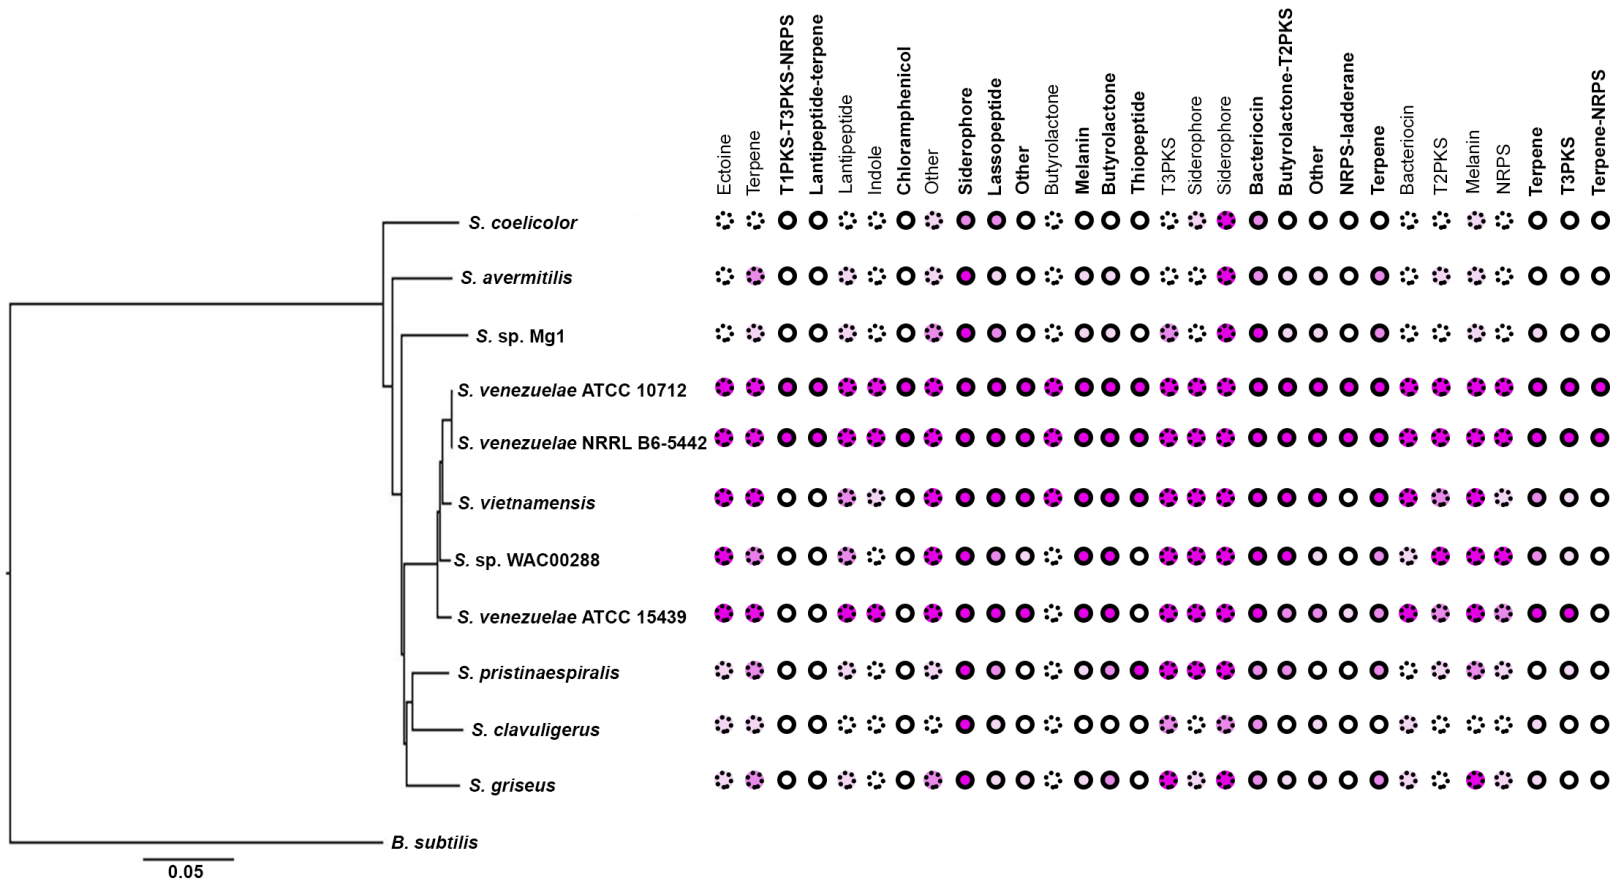

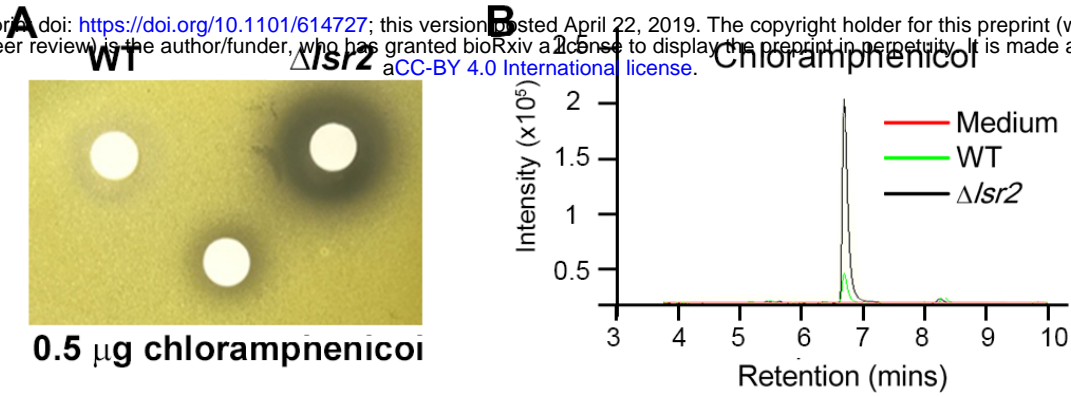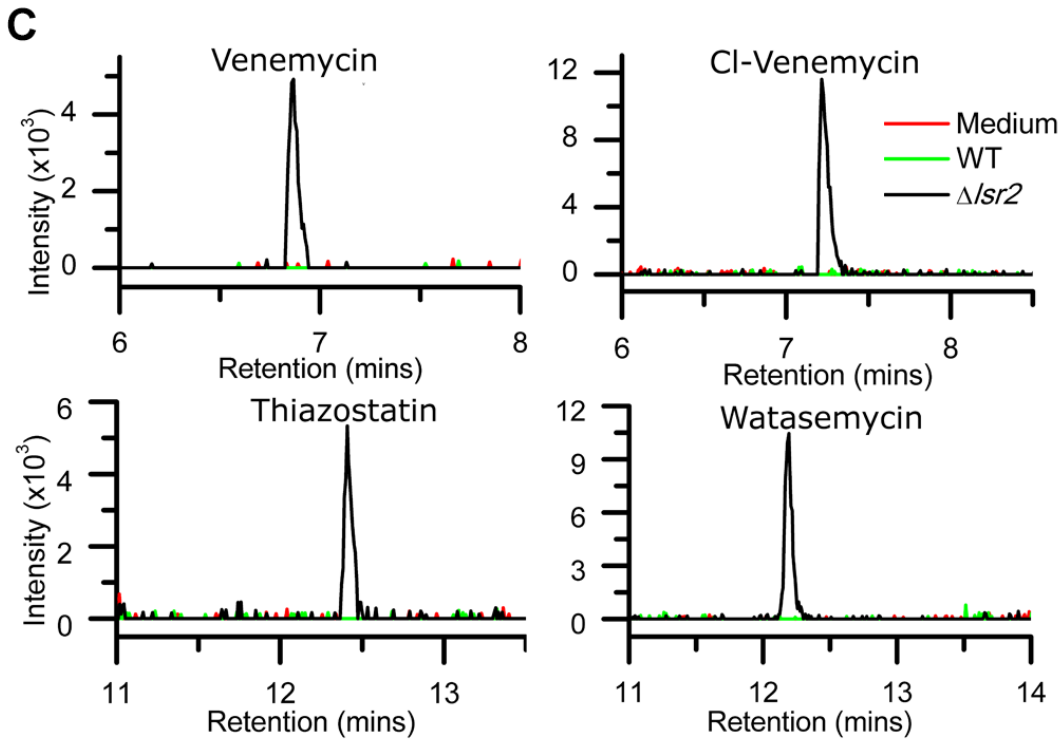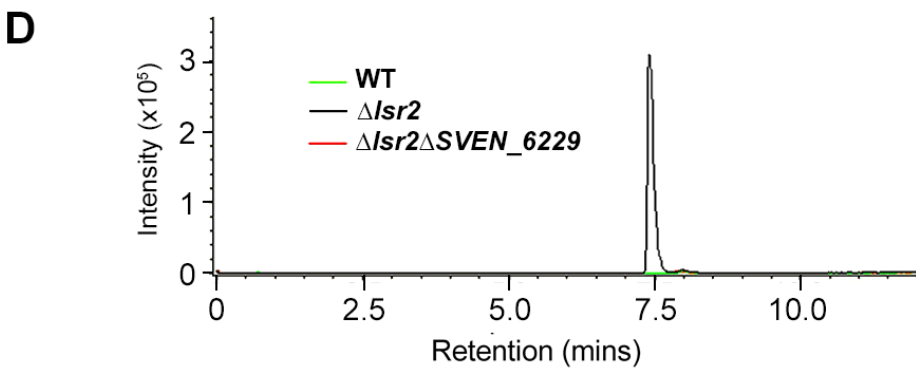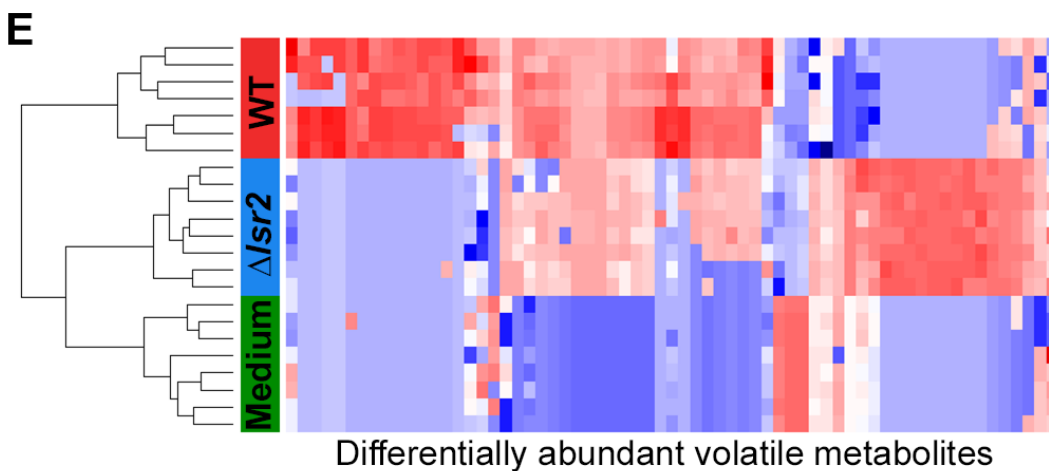

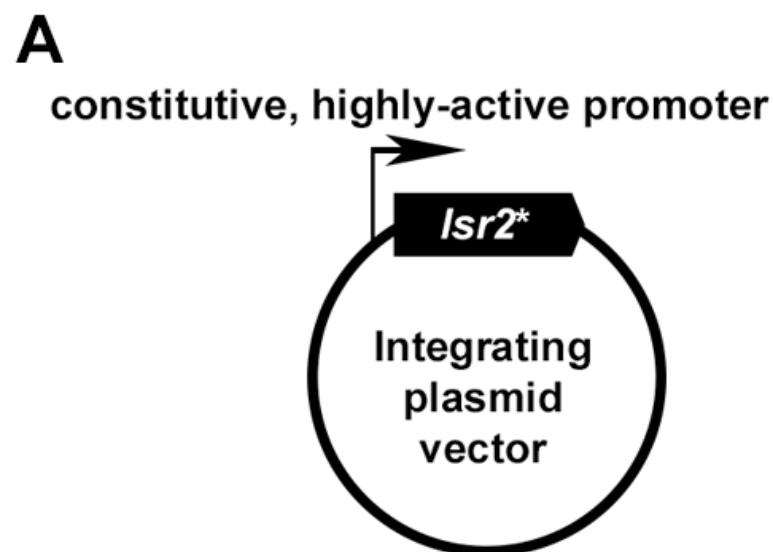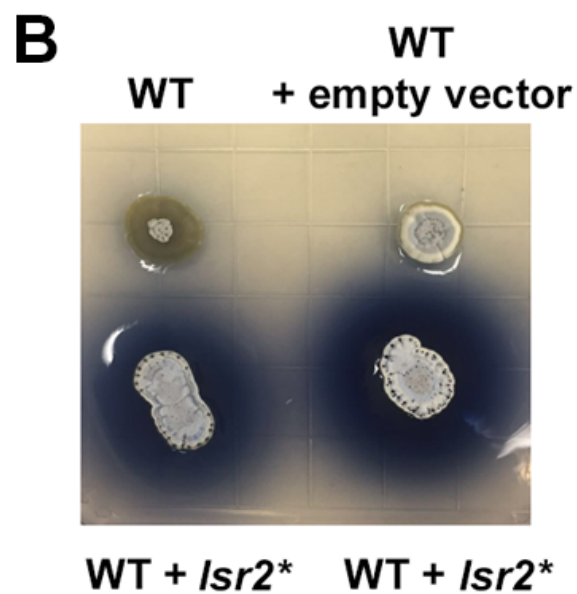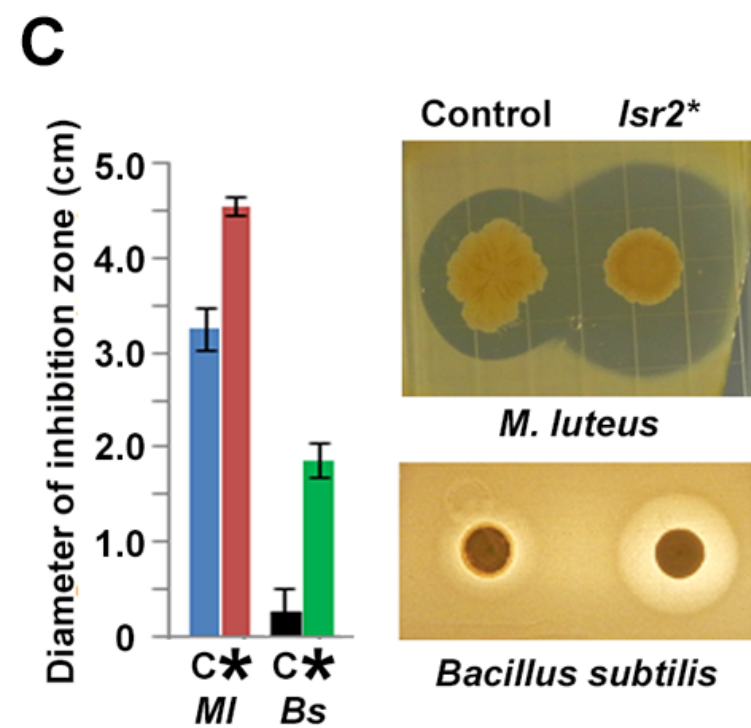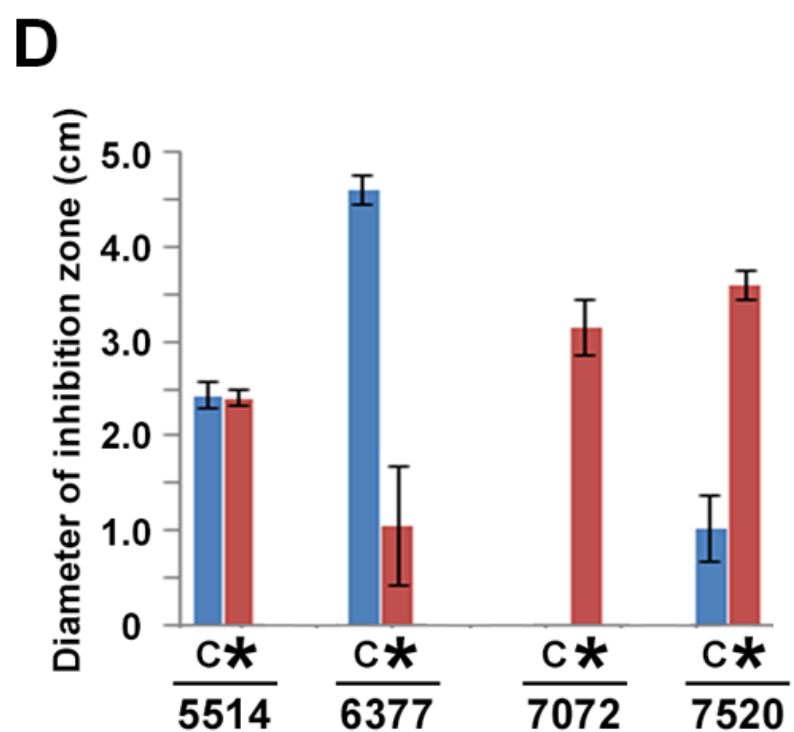

Source: http://biorxiv.org/content/10.1101/614727v1.full.pdf
